# Supplementary material
Source: PubMed Central journal article supplement (PMC10015554)
Supplement: NIHMS1877178-supplement-Supplemental_Materials.pdf [file NIHMS1877178-supplement-Supplemental_Materials.pdf]

**Web Appendix & Supplemental Materials**

**Supplemental Table 1: Metabolic Outcomes in Major Trials Evaluating Two-Drug ART Regimens**

| Studies in ART Naive PLWHIV                                                                                                                                                                                                                                                                                                                                                                                                                                                                                                                                                                                                                                                                                                                                                                                                                                                  |                    |                        |                                                                                                                                                                                                                                                                                                                                                                                                                                                                                          |                                                       |                                                                |                                                 |                |                |                      |                |         |               |                |         |                |                                                                                                                                                                                                     |        |                       |                                  |                 |                     |                                                                                                                                                                                                                                                                                                                                                                                                                                                                              |                                                                                                                                                                                                                                                                                                                                               |                         |                |                |                          |        |                                             |                |        |                   |                              |         |                                                     |                     |       |                                                                                                                                                                                                                                                                                                                                                                                                                                                                                                                |  |                |                |                                                 |        |        |                          |        |        |                                                   |        |        |                                  |        |        |                                                                                                                                                                                              |  |                |                |
|------------------------------------------------------------------------------------------------------------------------------------------------------------------------------------------------------------------------------------------------------------------------------------------------------------------------------------------------------------------------------------------------------------------------------------------------------------------------------------------------------------------------------------------------------------------------------------------------------------------------------------------------------------------------------------------------------------------------------------------------------------------------------------------------------------------------------------------------------------------------------|--------------------|------------------------|------------------------------------------------------------------------------------------------------------------------------------------------------------------------------------------------------------------------------------------------------------------------------------------------------------------------------------------------------------------------------------------------------------------------------------------------------------------------------------------|-------------------------------------------------------|----------------------------------------------------------------|-------------------------------------------------|----------------|----------------|----------------------|----------------|---------|---------------|----------------|---------|----------------|-----------------------------------------------------------------------------------------------------------------------------------------------------------------------------------------------------|--------|-----------------------|----------------------------------|-----------------|---------------------|------------------------------------------------------------------------------------------------------------------------------------------------------------------------------------------------------------------------------------------------------------------------------------------------------------------------------------------------------------------------------------------------------------------------------------------------------------------------------|-----------------------------------------------------------------------------------------------------------------------------------------------------------------------------------------------------------------------------------------------------------------------------------------------------------------------------------------------|-------------------------|----------------|----------------|--------------------------|--------|---------------------------------------------|----------------|--------|-------------------|------------------------------|---------|-----------------------------------------------------|---------------------|-------|----------------------------------------------------------------------------------------------------------------------------------------------------------------------------------------------------------------------------------------------------------------------------------------------------------------------------------------------------------------------------------------------------------------------------------------------------------------------------------------------------------------|--|----------------|----------------|-------------------------------------------------|--------|--------|--------------------------|--------|--------|---------------------------------------------------|--------|--------|----------------------------------|--------|--------|----------------------------------------------------------------------------------------------------------------------------------------------------------------------------------------------|--|----------------|----------------|
| Study                                                                                                                                                                                                                                                                                                                                                                                                                                                                                                                                                                                                                                                                                                                                                                                                                                                                        | 2-Drug ART Regimen | Comparator ART Regimen | Lipids                                                                                                                                                                                                                                                                                                                                                                                                                                                                                   | Renal                                                 | Bone Parameters                                                | Other Parameters                                |                |                |                      |                |         |               |                |         |                |                                                                                                                                                                                                     |        |                       |                                  |                 |                     |                                                                                                                                                                                                                                                                                                                                                                                                                                                                              |                                                                                                                                                                                                                                                                                                                                               |                         |                |                |                          |        |                                             |                |        |                   |                              |         |                                                     |                     |       |                                                                                                                                                                                                                                                                                                                                                                                                                                                                                                                |  |                |                |                                                 |        |        |                          |        |        |                                                   |        |        |                                  |        |        |                                                                                                                                                                                              |  |                |                |
| <b>Dolutegravir with lamivudine</b>                                                                                                                                                                                                                                                                                                                                                                                                                                                                                                                                                                                                                                                                                                                                                                                                                                          |                    |                        |                                                                                                                                                                                                                                                                                                                                                                                                                                                                                          |                                                       |                                                                |                                                 |                |                |                      |                |         |               |                |         |                |                                                                                                                                                                                                     |        |                       |                                  |                 |                     |                                                                                                                                                                                                                                                                                                                                                                                                                                                                              |                                                                                                                                                                                                                                                                                                                                               |                         |                |                |                          |        |                                             |                |        |                   |                              |         |                                                     |                     |       |                                                                                                                                                                                                                                                                                                                                                                                                                                                                                                                |  |                |                |                                                 |        |        |                          |        |        |                                                   |        |        |                                  |        |        |                                                                                                                                                                                              |  |                |                |
| GEMINI-1 & 2 <sup>16,17</sup>                                                                                                                                                                                                                                                                                                                                                                                                                                                                                                                                                                                                                                                                                                                                                                                                                                                | DTG/3TC            | DTG + TDF/3TC          | Mean change in lipids from baseline (week 48):                                                                                                                                                                                                                                                                                                                                                                                                                                           | Mean change in renal markers from baseline (week 48): | Mean change in bone turn-over markers from baseline (week 48): | Mean change in weight from baseline (week 144): |                |                |                      |                |         |               |                |         |                |                                                                                                                                                                                                     |        |                       |                                  |                 |                     |                                                                                                                                                                                                                                                                                                                                                                                                                                                                              |                                                                                                                                                                                                                                                                                                                                               |                         |                |                |                          |        |                                             |                |        |                   |                              |         |                                                     |                     |       |                                                                                                                                                                                                                                                                                                                                                                                                                                                                                                                |  |                |                |                                                 |        |        |                          |        |        |                                                   |        |        |                                  |        |        |                                                                                                                                                                                              |  |                |                |
|                                                                                                                                                                                                                                                                                                                                                                                                                                                                                                                                                                                                                                                                                                                                                                                                                                                                              |                    |                        | <table border="1"> <thead> <tr> <th></th> <th>2-drug regimen</th> <th>3-drug regimen</th> </tr> </thead> <tbody> <tr> <td>TC (mmol/L)**</td> <td>+ 0.32</td> <td>- 0.15</td> </tr> <tr> <td>HDL (mmol/L)**</td> <td>+ 0.15</td> <td>+ 0.02</td> </tr> <tr> <td>LDL (mmol/L)**</td> <td>- 0.17</td> <td>- 0.14</td> </tr> <tr> <td>Triglycerides (mmol/L)*</td> <td>- 0.03</td> <td>- 0.08</td> </tr> <tr> <td>TC/HDL Ratio*</td> <td>- 0.12</td> <td>- 0.24</td> </tr> </tbody> </table> |                                                       | 2-drug regimen                                                 | 3-drug regimen                                  | TC (mmol/L)**  | + 0.32         | - 0.15               | HDL (mmol/L)** | + 0.15  | + 0.02        | LDL (mmol/L)** | - 0.17  | - 0.14         | Triglycerides (mmol/L)*                                                                                                                                                                             | - 0.03 | - 0.08                | TC/HDL Ratio*                    | - 0.12          | - 0.24              | <table border="1"> <thead> <tr> <th></th> <th>2-drug regimen</th> <th>3-drug regimen</th> </tr> </thead> <tbody> <tr> <td>Cr (µmol/L)**</td> <td>+ 10.4</td> <td>+ 13.5</td> </tr> <tr> <td>GFR from Cr (CKD epi, mL/min per 1.73 m2)**</td> <td>- 12.1</td> <td>- 15.5</td> </tr> <tr> <td>Cystatin C (mg/L)</td> <td>- 0.1</td> <td>0.0</td> </tr> <tr> <td>GFR from cystatin C (CKD epi, mL/min per 1.73 m2)**</td> <td>+ 6.3</td> <td>+ 4.3</td> </tr> </tbody> </table> |                                                                                                                                                                                                                                                                                                                                               | 2-drug regimen          | 3-drug regimen | Cr (µmol/L)**  | + 10.4                   | + 13.5 | GFR from Cr (CKD epi, mL/min per 1.73 m2)** | - 12.1         | - 15.5 | Cystatin C (mg/L) | - 0.1                        | 0.0     | GFR from cystatin C (CKD epi, mL/min per 1.73 m2)** | + 6.3               | + 4.3 | <table border="1"> <thead> <tr> <th></th> <th>2-drug regimen</th> <th>3-drug regimen</th> </tr> </thead> <tbody> <tr> <td>Serum bone-specific alkaline phosphatase (µL)**</td> <td>+ 1.22</td> <td>+ 4.07</td> </tr> <tr> <td>Serum osteocalcin (µL)**</td> <td>+ 0.60</td> <td>+ 6.17</td> </tr> <tr> <td>Serum procollagen-1 N-terminal pro-peptide (µL)**</td> <td>+ 0.40</td> <td>+ 0.33</td> </tr> <tr> <td>Type I collagen C-peptide (µL)**</td> <td>+ 0.14</td> <td>+ 0.33</td> </tr> </tbody> </table> |  | 2-drug regimen | 3-drug regimen | Serum bone-specific alkaline phosphatase (µL)** | + 1.22 | + 4.07 | Serum osteocalcin (µL)** | + 0.60 | + 6.17 | Serum procollagen-1 N-terminal pro-peptide (µL)** | + 0.40 | + 0.33 | Type I collagen C-peptide (µL)** | + 0.14 | + 0.33 | <table border="1"> <thead> <tr> <th></th> <th>2-drug regimen</th> <th>3-drug regimen</th> </tr> </thead> <tbody> <tr> <td>Weight (kg)</td> <td>3.7</td> <td>2.4</td> </tr> </tbody> </table> |  | 2-drug regimen | 3-drug regimen |
|                                                                                                                                                                                                                                                                                                                                                                                                                                                                                                                                                                                                                                                                                                                                                                                                                                                                              | 2-drug regimen     | 3-drug regimen         |                                                                                                                                                                                                                                                                                                                                                                                                                                                                                          |                                                       |                                                                |                                                 |                |                |                      |                |         |               |                |         |                |                                                                                                                                                                                                     |        |                       |                                  |                 |                     |                                                                                                                                                                                                                                                                                                                                                                                                                                                                              |                                                                                                                                                                                                                                                                                                                                               |                         |                |                |                          |        |                                             |                |        |                   |                              |         |                                                     |                     |       |                                                                                                                                                                                                                                                                                                                                                                                                                                                                                                                |  |                |                |                                                 |        |        |                          |        |        |                                                   |        |        |                                  |        |        |                                                                                                                                                                                              |  |                |                |
| TC (mmol/L)**                                                                                                                                                                                                                                                                                                                                                                                                                                                                                                                                                                                                                                                                                                                                                                                                                                                                | + 0.32             | - 0.15                 |                                                                                                                                                                                                                                                                                                                                                                                                                                                                                          |                                                       |                                                                |                                                 |                |                |                      |                |         |               |                |         |                |                                                                                                                                                                                                     |        |                       |                                  |                 |                     |                                                                                                                                                                                                                                                                                                                                                                                                                                                                              |                                                                                                                                                                                                                                                                                                                                               |                         |                |                |                          |        |                                             |                |        |                   |                              |         |                                                     |                     |       |                                                                                                                                                                                                                                                                                                                                                                                                                                                                                                                |  |                |                |                                                 |        |        |                          |        |        |                                                   |        |        |                                  |        |        |                                                                                                                                                                                              |  |                |                |
| HDL (mmol/L)**                                                                                                                                                                                                                                                                                                                                                                                                                                                                                                                                                                                                                                                                                                                                                                                                                                                               | + 0.15             | + 0.02                 |                                                                                                                                                                                                                                                                                                                                                                                                                                                                                          |                                                       |                                                                |                                                 |                |                |                      |                |         |               |                |         |                |                                                                                                                                                                                                     |        |                       |                                  |                 |                     |                                                                                                                                                                                                                                                                                                                                                                                                                                                                              |                                                                                                                                                                                                                                                                                                                                               |                         |                |                |                          |        |                                             |                |        |                   |                              |         |                                                     |                     |       |                                                                                                                                                                                                                                                                                                                                                                                                                                                                                                                |  |                |                |                                                 |        |        |                          |        |        |                                                   |        |        |                                  |        |        |                                                                                                                                                                                              |  |                |                |
| LDL (mmol/L)**                                                                                                                                                                                                                                                                                                                                                                                                                                                                                                                                                                                                                                                                                                                                                                                                                                                               | - 0.17             | - 0.14                 |                                                                                                                                                                                                                                                                                                                                                                                                                                                                                          |                                                       |                                                                |                                                 |                |                |                      |                |         |               |                |         |                |                                                                                                                                                                                                     |        |                       |                                  |                 |                     |                                                                                                                                                                                                                                                                                                                                                                                                                                                                              |                                                                                                                                                                                                                                                                                                                                               |                         |                |                |                          |        |                                             |                |        |                   |                              |         |                                                     |                     |       |                                                                                                                                                                                                                                                                                                                                                                                                                                                                                                                |  |                |                |                                                 |        |        |                          |        |        |                                                   |        |        |                                  |        |        |                                                                                                                                                                                              |  |                |                |
| Triglycerides (mmol/L)*                                                                                                                                                                                                                                                                                                                                                                                                                                                                                                                                                                                                                                                                                                                                                                                                                                                      | - 0.03             | - 0.08                 |                                                                                                                                                                                                                                                                                                                                                                                                                                                                                          |                                                       |                                                                |                                                 |                |                |                      |                |         |               |                |         |                |                                                                                                                                                                                                     |        |                       |                                  |                 |                     |                                                                                                                                                                                                                                                                                                                                                                                                                                                                              |                                                                                                                                                                                                                                                                                                                                               |                         |                |                |                          |        |                                             |                |        |                   |                              |         |                                                     |                     |       |                                                                                                                                                                                                                                                                                                                                                                                                                                                                                                                |  |                |                |                                                 |        |        |                          |        |        |                                                   |        |        |                                  |        |        |                                                                                                                                                                                              |  |                |                |
| TC/HDL Ratio*                                                                                                                                                                                                                                                                                                                                                                                                                                                                                                                                                                                                                                                                                                                                                                                                                                                                | - 0.12             | - 0.24                 |                                                                                                                                                                                                                                                                                                                                                                                                                                                                                          |                                                       |                                                                |                                                 |                |                |                      |                |         |               |                |         |                |                                                                                                                                                                                                     |        |                       |                                  |                 |                     |                                                                                                                                                                                                                                                                                                                                                                                                                                                                              |                                                                                                                                                                                                                                                                                                                                               |                         |                |                |                          |        |                                             |                |        |                   |                              |         |                                                     |                     |       |                                                                                                                                                                                                                                                                                                                                                                                                                                                                                                                |  |                |                |                                                 |        |        |                          |        |        |                                                   |        |        |                                  |        |        |                                                                                                                                                                                              |  |                |                |
|                                                                                                                                                                                                                                                                                                                                                                                                                                                                                                                                                                                                                                                                                                                                                                                                                                                                              | 2-drug regimen     | 3-drug regimen         |                                                                                                                                                                                                                                                                                                                                                                                                                                                                                          |                                                       |                                                                |                                                 |                |                |                      |                |         |               |                |         |                |                                                                                                                                                                                                     |        |                       |                                  |                 |                     |                                                                                                                                                                                                                                                                                                                                                                                                                                                                              |                                                                                                                                                                                                                                                                                                                                               |                         |                |                |                          |        |                                             |                |        |                   |                              |         |                                                     |                     |       |                                                                                                                                                                                                                                                                                                                                                                                                                                                                                                                |  |                |                |                                                 |        |        |                          |        |        |                                                   |        |        |                                  |        |        |                                                                                                                                                                                              |  |                |                |
| Cr (µmol/L)**                                                                                                                                                                                                                                                                                                                                                                                                                                                                                                                                                                                                                                                                                                                                                                                                                                                                | + 10.4             | + 13.5                 |                                                                                                                                                                                                                                                                                                                                                                                                                                                                                          |                                                       |                                                                |                                                 |                |                |                      |                |         |               |                |         |                |                                                                                                                                                                                                     |        |                       |                                  |                 |                     |                                                                                                                                                                                                                                                                                                                                                                                                                                                                              |                                                                                                                                                                                                                                                                                                                                               |                         |                |                |                          |        |                                             |                |        |                   |                              |         |                                                     |                     |       |                                                                                                                                                                                                                                                                                                                                                                                                                                                                                                                |  |                |                |                                                 |        |        |                          |        |        |                                                   |        |        |                                  |        |        |                                                                                                                                                                                              |  |                |                |
| GFR from Cr (CKD epi, mL/min per 1.73 m2)**                                                                                                                                                                                                                                                                                                                                                                                                                                                                                                                                                                                                                                                                                                                                                                                                                                  | - 12.1             | - 15.5                 |                                                                                                                                                                                                                                                                                                                                                                                                                                                                                          |                                                       |                                                                |                                                 |                |                |                      |                |         |               |                |         |                |                                                                                                                                                                                                     |        |                       |                                  |                 |                     |                                                                                                                                                                                                                                                                                                                                                                                                                                                                              |                                                                                                                                                                                                                                                                                                                                               |                         |                |                |                          |        |                                             |                |        |                   |                              |         |                                                     |                     |       |                                                                                                                                                                                                                                                                                                                                                                                                                                                                                                                |  |                |                |                                                 |        |        |                          |        |        |                                                   |        |        |                                  |        |        |                                                                                                                                                                                              |  |                |                |
| Cystatin C (mg/L)                                                                                                                                                                                                                                                                                                                                                                                                                                                                                                                                                                                                                                                                                                                                                                                                                                                            | - 0.1              | 0.0                    |                                                                                                                                                                                                                                                                                                                                                                                                                                                                                          |                                                       |                                                                |                                                 |                |                |                      |                |         |               |                |         |                |                                                                                                                                                                                                     |        |                       |                                  |                 |                     |                                                                                                                                                                                                                                                                                                                                                                                                                                                                              |                                                                                                                                                                                                                                                                                                                                               |                         |                |                |                          |        |                                             |                |        |                   |                              |         |                                                     |                     |       |                                                                                                                                                                                                                                                                                                                                                                                                                                                                                                                |  |                |                |                                                 |        |        |                          |        |        |                                                   |        |        |                                  |        |        |                                                                                                                                                                                              |  |                |                |
| GFR from cystatin C (CKD epi, mL/min per 1.73 m2)**                                                                                                                                                                                                                                                                                                                                                                                                                                                                                                                                                                                                                                                                                                                                                                                                                          | + 6.3              | + 4.3                  |                                                                                                                                                                                                                                                                                                                                                                                                                                                                                          |                                                       |                                                                |                                                 |                |                |                      |                |         |               |                |         |                |                                                                                                                                                                                                     |        |                       |                                  |                 |                     |                                                                                                                                                                                                                                                                                                                                                                                                                                                                              |                                                                                                                                                                                                                                                                                                                                               |                         |                |                |                          |        |                                             |                |        |                   |                              |         |                                                     |                     |       |                                                                                                                                                                                                                                                                                                                                                                                                                                                                                                                |  |                |                |                                                 |        |        |                          |        |        |                                                   |        |        |                                  |        |        |                                                                                                                                                                                              |  |                |                |
|                                                                                                                                                                                                                                                                                                                                                                                                                                                                                                                                                                                                                                                                                                                                                                                                                                                                              | 2-drug regimen     | 3-drug regimen         |                                                                                                                                                                                                                                                                                                                                                                                                                                                                                          |                                                       |                                                                |                                                 |                |                |                      |                |         |               |                |         |                |                                                                                                                                                                                                     |        |                       |                                  |                 |                     |                                                                                                                                                                                                                                                                                                                                                                                                                                                                              |                                                                                                                                                                                                                                                                                                                                               |                         |                |                |                          |        |                                             |                |        |                   |                              |         |                                                     |                     |       |                                                                                                                                                                                                                                                                                                                                                                                                                                                                                                                |  |                |                |                                                 |        |        |                          |        |        |                                                   |        |        |                                  |        |        |                                                                                                                                                                                              |  |                |                |
| Serum bone-specific alkaline phosphatase (µL)**                                                                                                                                                                                                                                                                                                                                                                                                                                                                                                                                                                                                                                                                                                                                                                                                                              | + 1.22             | + 4.07                 |                                                                                                                                                                                                                                                                                                                                                                                                                                                                                          |                                                       |                                                                |                                                 |                |                |                      |                |         |               |                |         |                |                                                                                                                                                                                                     |        |                       |                                  |                 |                     |                                                                                                                                                                                                                                                                                                                                                                                                                                                                              |                                                                                                                                                                                                                                                                                                                                               |                         |                |                |                          |        |                                             |                |        |                   |                              |         |                                                     |                     |       |                                                                                                                                                                                                                                                                                                                                                                                                                                                                                                                |  |                |                |                                                 |        |        |                          |        |        |                                                   |        |        |                                  |        |        |                                                                                                                                                                                              |  |                |                |
| Serum osteocalcin (µL)**                                                                                                                                                                                                                                                                                                                                                                                                                                                                                                                                                                                                                                                                                                                                                                                                                                                     | + 0.60             | + 6.17                 |                                                                                                                                                                                                                                                                                                                                                                                                                                                                                          |                                                       |                                                                |                                                 |                |                |                      |                |         |               |                |         |                |                                                                                                                                                                                                     |        |                       |                                  |                 |                     |                                                                                                                                                                                                                                                                                                                                                                                                                                                                              |                                                                                                                                                                                                                                                                                                                                               |                         |                |                |                          |        |                                             |                |        |                   |                              |         |                                                     |                     |       |                                                                                                                                                                                                                                                                                                                                                                                                                                                                                                                |  |                |                |                                                 |        |        |                          |        |        |                                                   |        |        |                                  |        |        |                                                                                                                                                                                              |  |                |                |
| Serum procollagen-1 N-terminal pro-peptide (µL)**                                                                                                                                                                                                                                                                                                                                                                                                                                                                                                                                                                                                                                                                                                                                                                                                                            | + 0.40             | + 0.33                 |                                                                                                                                                                                                                                                                                                                                                                                                                                                                                          |                                                       |                                                                |                                                 |                |                |                      |                |         |               |                |         |                |                                                                                                                                                                                                     |        |                       |                                  |                 |                     |                                                                                                                                                                                                                                                                                                                                                                                                                                                                              |                                                                                                                                                                                                                                                                                                                                               |                         |                |                |                          |        |                                             |                |        |                   |                              |         |                                                     |                     |       |                                                                                                                                                                                                                                                                                                                                                                                                                                                                                                                |  |                |                |                                                 |        |        |                          |        |        |                                                   |        |        |                                  |        |        |                                                                                                                                                                                              |  |                |                |
| Type I collagen C-peptide (µL)**                                                                                                                                                                                                                                                                                                                                                                                                                                                                                                                                                                                                                                                                                                                                                                                                                                             | + 0.14             | + 0.33                 |                                                                                                                                                                                                                                                                                                                                                                                                                                                                                          |                                                       |                                                                |                                                 |                |                |                      |                |         |               |                |         |                |                                                                                                                                                                                                     |        |                       |                                  |                 |                     |                                                                                                                                                                                                                                                                                                                                                                                                                                                                              |                                                                                                                                                                                                                                                                                                                                               |                         |                |                |                          |        |                                             |                |        |                   |                              |         |                                                     |                     |       |                                                                                                                                                                                                                                                                                                                                                                                                                                                                                                                |  |                |                |                                                 |        |        |                          |        |        |                                                   |        |        |                                  |        |        |                                                                                                                                                                                              |  |                |                |
|                                                                                                                                                                                                                                                                                                                                                                                                                                                                                                                                                                                                                                                                                                                                                                                                                                                                              | 2-drug regimen     | 3-drug regimen         |                                                                                                                                                                                                                                                                                                                                                                                                                                                                                          |                                                       |                                                                |                                                 |                |                |                      |                |         |               |                |         |                |                                                                                                                                                                                                     |        |                       |                                  |                 |                     |                                                                                                                                                                                                                                                                                                                                                                                                                                                                              |                                                                                                                                                                                                                                                                                                                                               |                         |                |                |                          |        |                                             |                |        |                   |                              |         |                                                     |                     |       |                                                                                                                                                                                                                                                                                                                                                                                                                                                                                                                |  |                |                |                                                 |        |        |                          |        |        |                                                   |        |        |                                  |        |        |                                                                                                                                                                                              |  |                |                |
| Weight (kg)                                                                                                                                                                                                                                                                                                                                                                                                                                                                                                                                                                                                                                                                                                                                                                                                                                                                  | 3.7                | 2.4                    |                                                                                                                                                                                                                                                                                                                                                                                                                                                                                          |                                                       |                                                                |                                                 |                |                |                      |                |         |               |                |         |                |                                                                                                                                                                                                     |        |                       |                                  |                 |                     |                                                                                                                                                                                                                                                                                                                                                                                                                                                                              |                                                                                                                                                                                                                                                                                                                                               |                         |                |                |                          |        |                                             |                |        |                   |                              |         |                                                     |                     |       |                                                                                                                                                                                                                                                                                                                                                                                                                                                                                                                |  |                |                |                                                 |        |        |                          |        |        |                                                   |        |        |                                  |        |        |                                                                                                                                                                                              |  |                |                |
| *Favorable profile maintained through week 144                                                                                                                                                                                                                                                                                                                                                                                                                                                                                                                                                                                                                                                                                                                                                                                                                               |                    |                        |                                                                                                                                                                                                                                                                                                                                                                                                                                                                                          | *Favorable profile maintained through week 144        |                                                                |                                                 |                |                |                      |                |         |               |                |         |                |                                                                                                                                                                                                     |        |                       |                                  |                 |                     |                                                                                                                                                                                                                                                                                                                                                                                                                                                                              |                                                                                                                                                                                                                                                                                                                                               |                         |                |                |                          |        |                                             |                |        |                   |                              |         |                                                     |                     |       |                                                                                                                                                                                                                                                                                                                                                                                                                                                                                                                |  |                |                |                                                 |        |        |                          |        |        |                                                   |        |        |                                  |        |        |                                                                                                                                                                                              |  |                |                |
| <b>Boosted protease inhibitor with lamivudine</b>                                                                                                                                                                                                                                                                                                                                                                                                                                                                                                                                                                                                                                                                                                                                                                                                                            |                    |                        |                                                                                                                                                                                                                                                                                                                                                                                                                                                                                          |                                                       |                                                                |                                                 |                |                |                      |                |         |               |                |         |                |                                                                                                                                                                                                     |        |                       |                                  |                 |                     |                                                                                                                                                                                                                                                                                                                                                                                                                                                                              |                                                                                                                                                                                                                                                                                                                                               |                         |                |                |                          |        |                                             |                |        |                   |                              |         |                                                     |                     |       |                                                                                                                                                                                                                                                                                                                                                                                                                                                                                                                |  |                |                |                                                 |        |        |                          |        |        |                                                   |        |        |                                  |        |        |                                                                                                                                                                                              |  |                |                |
| GARDEL <sup>18</sup>                                                                                                                                                                                                                                                                                                                                                                                                                                                                                                                                                                                                                                                                                                                                                                                                                                                         | LPV/r + 3TC        | LPV/r + 2 NRTIs        | Mean change in lipids from baseline (week 48):                                                                                                                                                                                                                                                                                                                                                                                                                                           | Not reported                                          | Not reported                                                   |                                                 |                |                |                      |                |         |               |                |         |                |                                                                                                                                                                                                     |        |                       |                                  |                 |                     |                                                                                                                                                                                                                                                                                                                                                                                                                                                                              |                                                                                                                                                                                                                                                                                                                                               |                         |                |                |                          |        |                                             |                |        |                   |                              |         |                                                     |                     |       |                                                                                                                                                                                                                                                                                                                                                                                                                                                                                                                |  |                |                |                                                 |        |        |                          |        |        |                                                   |        |        |                                  |        |        |                                                                                                                                                                                              |  |                |                |
|                                                                                                                                                                                                                                                                                                                                                                                                                                                                                                                                                                                                                                                                                                                                                                                                                                                                              |                    |                        | <table border="1"> <thead> <tr> <th></th> <th>2-drug regimen</th> <th>3-drug regimen</th> </tr> </thead> <tbody> <tr> <td>TC (%)</td> <td>+ 32</td> <td>+ 26</td> </tr> <tr> <td>HDL (%)</td> <td>+ 33</td> <td>+ 28</td> </tr> <tr> <td>LDL (%)</td> <td>+ 25</td> <td>+ 16</td> </tr> <tr> <td>Triglycerides (%)</td> <td>+ 55</td> <td>+ 92</td> </tr> </tbody> </table>                                                                                                              |                                                       | 2-drug regimen                                                 | 3-drug regimen                                  | TC (%)         | + 32           | + 26                 | HDL (%)        | + 33    | + 28          | LDL (%)        | + 25    | + 16           | Triglycerides (%)                                                                                                                                                                                   | + 55   | + 92                  | *Significance level not reported |                 |                     |                                                                                                                                                                                                                                                                                                                                                                                                                                                                              |                                                                                                                                                                                                                                                                                                                                               |                         |                |                |                          |        |                                             |                |        |                   |                              |         |                                                     |                     |       |                                                                                                                                                                                                                                                                                                                                                                                                                                                                                                                |  |                |                |                                                 |        |        |                          |        |        |                                                   |        |        |                                  |        |        |                                                                                                                                                                                              |  |                |                |
|                                                                                                                                                                                                                                                                                                                                                                                                                                                                                                                                                                                                                                                                                                                                                                                                                                                                              | 2-drug regimen     | 3-drug regimen         |                                                                                                                                                                                                                                                                                                                                                                                                                                                                                          |                                                       |                                                                |                                                 |                |                |                      |                |         |               |                |         |                |                                                                                                                                                                                                     |        |                       |                                  |                 |                     |                                                                                                                                                                                                                                                                                                                                                                                                                                                                              |                                                                                                                                                                                                                                                                                                                                               |                         |                |                |                          |        |                                             |                |        |                   |                              |         |                                                     |                     |       |                                                                                                                                                                                                                                                                                                                                                                                                                                                                                                                |  |                |                |                                                 |        |        |                          |        |        |                                                   |        |        |                                  |        |        |                                                                                                                                                                                              |  |                |                |
| TC (%)                                                                                                                                                                                                                                                                                                                                                                                                                                                                                                                                                                                                                                                                                                                                                                                                                                                                       | + 32               | + 26                   |                                                                                                                                                                                                                                                                                                                                                                                                                                                                                          |                                                       |                                                                |                                                 |                |                |                      |                |         |               |                |         |                |                                                                                                                                                                                                     |        |                       |                                  |                 |                     |                                                                                                                                                                                                                                                                                                                                                                                                                                                                              |                                                                                                                                                                                                                                                                                                                                               |                         |                |                |                          |        |                                             |                |        |                   |                              |         |                                                     |                     |       |                                                                                                                                                                                                                                                                                                                                                                                                                                                                                                                |  |                |                |                                                 |        |        |                          |        |        |                                                   |        |        |                                  |        |        |                                                                                                                                                                                              |  |                |                |
| HDL (%)                                                                                                                                                                                                                                                                                                                                                                                                                                                                                                                                                                                                                                                                                                                                                                                                                                                                      | + 33               | + 28                   |                                                                                                                                                                                                                                                                                                                                                                                                                                                                                          |                                                       |                                                                |                                                 |                |                |                      |                |         |               |                |         |                |                                                                                                                                                                                                     |        |                       |                                  |                 |                     |                                                                                                                                                                                                                                                                                                                                                                                                                                                                              |                                                                                                                                                                                                                                                                                                                                               |                         |                |                |                          |        |                                             |                |        |                   |                              |         |                                                     |                     |       |                                                                                                                                                                                                                                                                                                                                                                                                                                                                                                                |  |                |                |                                                 |        |        |                          |        |        |                                                   |        |        |                                  |        |        |                                                                                                                                                                                              |  |                |                |
| LDL (%)                                                                                                                                                                                                                                                                                                                                                                                                                                                                                                                                                                                                                                                                                                                                                                                                                                                                      | + 25               | + 16                   |                                                                                                                                                                                                                                                                                                                                                                                                                                                                                          |                                                       |                                                                |                                                 |                |                |                      |                |         |               |                |         |                |                                                                                                                                                                                                     |        |                       |                                  |                 |                     |                                                                                                                                                                                                                                                                                                                                                                                                                                                                              |                                                                                                                                                                                                                                                                                                                                               |                         |                |                |                          |        |                                             |                |        |                   |                              |         |                                                     |                     |       |                                                                                                                                                                                                                                                                                                                                                                                                                                                                                                                |  |                |                |                                                 |        |        |                          |        |        |                                                   |        |        |                                  |        |        |                                                                                                                                                                                              |  |                |                |
| Triglycerides (%)                                                                                                                                                                                                                                                                                                                                                                                                                                                                                                                                                                                                                                                                                                                                                                                                                                                            | + 55               | + 92                   |                                                                                                                                                                                                                                                                                                                                                                                                                                                                                          |                                                       |                                                                |                                                 |                |                |                      |                |         |               |                |         |                |                                                                                                                                                                                                     |        |                       |                                  |                 |                     |                                                                                                                                                                                                                                                                                                                                                                                                                                                                              |                                                                                                                                                                                                                                                                                                                                               |                         |                |                |                          |        |                                             |                |        |                   |                              |         |                                                     |                     |       |                                                                                                                                                                                                                                                                                                                                                                                                                                                                                                                |  |                |                |                                                 |        |        |                          |        |        |                                                   |        |        |                                  |        |        |                                                                                                                                                                                              |  |                |                |
| <b>Boosted PI + Integrase Inhibitor</b>                                                                                                                                                                                                                                                                                                                                                                                                                                                                                                                                                                                                                                                                                                                                                                                                                                      |                    |                        |                                                                                                                                                                                                                                                                                                                                                                                                                                                                                          |                                                       |                                                                |                                                 |                |                |                      |                |         |               |                |         |                |                                                                                                                                                                                                     |        |                       |                                  |                 |                     |                                                                                                                                                                                                                                                                                                                                                                                                                                                                              |                                                                                                                                                                                                                                                                                                                                               |                         |                |                |                          |        |                                             |                |        |                   |                              |         |                                                     |                     |       |                                                                                                                                                                                                                                                                                                                                                                                                                                                                                                                |  |                |                |                                                 |        |        |                          |        |        |                                                   |        |        |                                  |        |        |                                                                                                                                                                                              |  |                |                |
| NEAT 001/ANRS 143 <sup>19</sup>                                                                                                                                                                                                                                                                                                                                                                                                                                                                                                                                                                                                                                                                                                                                                                                                                                              | DRV/r + RAL        | DRV/r + TDF/FTC        | Mean change in lipids from baseline (week 96):                                                                                                                                                                                                                                                                                                                                                                                                                                           | Mean change in renal markers from baseline (week 96): | Mean % change in BMD from baseline (week 48):                  |                                                 |                |                |                      |                |         |               |                |         |                |                                                                                                                                                                                                     |        |                       |                                  |                 |                     |                                                                                                                                                                                                                                                                                                                                                                                                                                                                              |                                                                                                                                                                                                                                                                                                                                               |                         |                |                |                          |        |                                             |                |        |                   |                              |         |                                                     |                     |       |                                                                                                                                                                                                                                                                                                                                                                                                                                                                                                                |  |                |                |                                                 |        |        |                          |        |        |                                                   |        |        |                                  |        |        |                                                                                                                                                                                              |  |                |                |
|                                                                                                                                                                                                                                                                                                                                                                                                                                                                                                                                                                                                                                                                                                                                                                                                                                                                              |                    |                        | <table border="1"> <thead> <tr> <th></th> <th>2-drug regimen</th> <th>3-drug regimen</th> </tr> </thead> <tbody> <tr> <td>TC (mmol/L)**</td> <td>+ 0.9</td> <td>+ 0.5</td> </tr> <tr> <td>HDL (mmol/L)**</td> <td>+ 0.3</td> <td>+ 0.2</td> </tr> <tr> <td>LDL (mmol/L)*</td> <td>+ 0.5</td> <td>+ 0.4</td> </tr> </tbody> </table>                                                                                                                                                      |                                                       | 2-drug regimen                                                 | 3-drug regimen                                  | TC (mmol/L)**  | + 0.9          | + 0.5                | HDL (mmol/L)** | + 0.3   | + 0.2         | LDL (mmol/L)*  | + 0.5   | + 0.4          | <table border="1"> <thead> <tr> <th></th> <th>2-drug regimen</th> <th>3-drug regimen</th> </tr> </thead> <tbody> <tr> <td>CrCl (mL/min)**</td> <td>+ 0.8</td> <td>-4.6</td> </tr> </tbody> </table> |        | 2-drug regimen        | 3-drug regimen                   | CrCl (mL/min)** | + 0.8               | -4.6                                                                                                                                                                                                                                                                                                                                                                                                                                                                         | <table border="1"> <thead> <tr> <th></th> <th>2-drug regimen</th> <th>3-drug regimen</th> </tr> </thead> <tbody> <tr> <td>Lumbar spine (%)</td> <td>-1.00*</td> <td>-2.49**</td> </tr> <tr> <td>Total hip (%)</td> <td>-0.73</td> <td>-3.30**</td> </tr> <tr> <td>Femoral Neck</td> <td>-1.41**</td> <td>-3.45**</td> </tr> </tbody> </table> |                         | 2-drug regimen | 3-drug regimen | Lumbar spine (%)         | -1.00* | -2.49**                                     | Total hip (%)  | -0.73  | -3.30**           | Femoral Neck                 | -1.41** | -3.45**                                             |                     |       |                                                                                                                                                                                                                                                                                                                                                                                                                                                                                                                |  |                |                |                                                 |        |        |                          |        |        |                                                   |        |        |                                  |        |        |                                                                                                                                                                                              |  |                |                |
|                                                                                                                                                                                                                                                                                                                                                                                                                                                                                                                                                                                                                                                                                                                                                                                                                                                                              | 2-drug regimen     | 3-drug regimen         |                                                                                                                                                                                                                                                                                                                                                                                                                                                                                          |                                                       |                                                                |                                                 |                |                |                      |                |         |               |                |         |                |                                                                                                                                                                                                     |        |                       |                                  |                 |                     |                                                                                                                                                                                                                                                                                                                                                                                                                                                                              |                                                                                                                                                                                                                                                                                                                                               |                         |                |                |                          |        |                                             |                |        |                   |                              |         |                                                     |                     |       |                                                                                                                                                                                                                                                                                                                                                                                                                                                                                                                |  |                |                |                                                 |        |        |                          |        |        |                                                   |        |        |                                  |        |        |                                                                                                                                                                                              |  |                |                |
| TC (mmol/L)**                                                                                                                                                                                                                                                                                                                                                                                                                                                                                                                                                                                                                                                                                                                                                                                                                                                                | + 0.9              | + 0.5                  |                                                                                                                                                                                                                                                                                                                                                                                                                                                                                          |                                                       |                                                                |                                                 |                |                |                      |                |         |               |                |         |                |                                                                                                                                                                                                     |        |                       |                                  |                 |                     |                                                                                                                                                                                                                                                                                                                                                                                                                                                                              |                                                                                                                                                                                                                                                                                                                                               |                         |                |                |                          |        |                                             |                |        |                   |                              |         |                                                     |                     |       |                                                                                                                                                                                                                                                                                                                                                                                                                                                                                                                |  |                |                |                                                 |        |        |                          |        |        |                                                   |        |        |                                  |        |        |                                                                                                                                                                                              |  |                |                |
| HDL (mmol/L)**                                                                                                                                                                                                                                                                                                                                                                                                                                                                                                                                                                                                                                                                                                                                                                                                                                                               | + 0.3              | + 0.2                  |                                                                                                                                                                                                                                                                                                                                                                                                                                                                                          |                                                       |                                                                |                                                 |                |                |                      |                |         |               |                |         |                |                                                                                                                                                                                                     |        |                       |                                  |                 |                     |                                                                                                                                                                                                                                                                                                                                                                                                                                                                              |                                                                                                                                                                                                                                                                                                                                               |                         |                |                |                          |        |                                             |                |        |                   |                              |         |                                                     |                     |       |                                                                                                                                                                                                                                                                                                                                                                                                                                                                                                                |  |                |                |                                                 |        |        |                          |        |        |                                                   |        |        |                                  |        |        |                                                                                                                                                                                              |  |                |                |
| LDL (mmol/L)*                                                                                                                                                                                                                                                                                                                                                                                                                                                                                                                                                                                                                                                                                                                                                                                                                                                                | + 0.5              | + 0.4                  |                                                                                                                                                                                                                                                                                                                                                                                                                                                                                          |                                                       |                                                                |                                                 |                |                |                      |                |         |               |                |         |                |                                                                                                                                                                                                     |        |                       |                                  |                 |                     |                                                                                                                                                                                                                                                                                                                                                                                                                                                                              |                                                                                                                                                                                                                                                                                                                                               |                         |                |                |                          |        |                                             |                |        |                   |                              |         |                                                     |                     |       |                                                                                                                                                                                                                                                                                                                                                                                                                                                                                                                |  |                |                |                                                 |        |        |                          |        |        |                                                   |        |        |                                  |        |        |                                                                                                                                                                                              |  |                |                |
|                                                                                                                                                                                                                                                                                                                                                                                                                                                                                                                                                                                                                                                                                                                                                                                                                                                                              | 2-drug regimen     | 3-drug regimen         |                                                                                                                                                                                                                                                                                                                                                                                                                                                                                          |                                                       |                                                                |                                                 |                |                |                      |                |         |               |                |         |                |                                                                                                                                                                                                     |        |                       |                                  |                 |                     |                                                                                                                                                                                                                                                                                                                                                                                                                                                                              |                                                                                                                                                                                                                                                                                                                                               |                         |                |                |                          |        |                                             |                |        |                   |                              |         |                                                     |                     |       |                                                                                                                                                                                                                                                                                                                                                                                                                                                                                                                |  |                |                |                                                 |        |        |                          |        |        |                                                   |        |        |                                  |        |        |                                                                                                                                                                                              |  |                |                |
| CrCl (mL/min)**                                                                                                                                                                                                                                                                                                                                                                                                                                                                                                                                                                                                                                                                                                                                                                                                                                                              | + 0.8              | -4.6                   |                                                                                                                                                                                                                                                                                                                                                                                                                                                                                          |                                                       |                                                                |                                                 |                |                |                      |                |         |               |                |         |                |                                                                                                                                                                                                     |        |                       |                                  |                 |                     |                                                                                                                                                                                                                                                                                                                                                                                                                                                                              |                                                                                                                                                                                                                                                                                                                                               |                         |                |                |                          |        |                                             |                |        |                   |                              |         |                                                     |                     |       |                                                                                                                                                                                                                                                                                                                                                                                                                                                                                                                |  |                |                |                                                 |        |        |                          |        |        |                                                   |        |        |                                  |        |        |                                                                                                                                                                                              |  |                |                |
|                                                                                                                                                                                                                                                                                                                                                                                                                                                                                                                                                                                                                                                                                                                                                                                                                                                                              | 2-drug regimen     | 3-drug regimen         |                                                                                                                                                                                                                                                                                                                                                                                                                                                                                          |                                                       |                                                                |                                                 |                |                |                      |                |         |               |                |         |                |                                                                                                                                                                                                     |        |                       |                                  |                 |                     |                                                                                                                                                                                                                                                                                                                                                                                                                                                                              |                                                                                                                                                                                                                                                                                                                                               |                         |                |                |                          |        |                                             |                |        |                   |                              |         |                                                     |                     |       |                                                                                                                                                                                                                                                                                                                                                                                                                                                                                                                |  |                |                |                                                 |        |        |                          |        |        |                                                   |        |        |                                  |        |        |                                                                                                                                                                                              |  |                |                |
| Lumbar spine (%)                                                                                                                                                                                                                                                                                                                                                                                                                                                                                                                                                                                                                                                                                                                                                                                                                                                             | -1.00*             | -2.49**                |                                                                                                                                                                                                                                                                                                                                                                                                                                                                                          |                                                       |                                                                |                                                 |                |                |                      |                |         |               |                |         |                |                                                                                                                                                                                                     |        |                       |                                  |                 |                     |                                                                                                                                                                                                                                                                                                                                                                                                                                                                              |                                                                                                                                                                                                                                                                                                                                               |                         |                |                |                          |        |                                             |                |        |                   |                              |         |                                                     |                     |       |                                                                                                                                                                                                                                                                                                                                                                                                                                                                                                                |  |                |                |                                                 |        |        |                          |        |        |                                                   |        |        |                                  |        |        |                                                                                                                                                                                              |  |                |                |
| Total hip (%)                                                                                                                                                                                                                                                                                                                                                                                                                                                                                                                                                                                                                                                                                                                                                                                                                                                                | -0.73              | -3.30**                |                                                                                                                                                                                                                                                                                                                                                                                                                                                                                          |                                                       |                                                                |                                                 |                |                |                      |                |         |               |                |         |                |                                                                                                                                                                                                     |        |                       |                                  |                 |                     |                                                                                                                                                                                                                                                                                                                                                                                                                                                                              |                                                                                                                                                                                                                                                                                                                                               |                         |                |                |                          |        |                                             |                |        |                   |                              |         |                                                     |                     |       |                                                                                                                                                                                                                                                                                                                                                                                                                                                                                                                |  |                |                |                                                 |        |        |                          |        |        |                                                   |        |        |                                  |        |        |                                                                                                                                                                                              |  |                |                |
| Femoral Neck                                                                                                                                                                                                                                                                                                                                                                                                                                                                                                                                                                                                                                                                                                                                                                                                                                                                 | -1.41**            | -3.45**                |                                                                                                                                                                                                                                                                                                                                                                                                                                                                                          |                                                       |                                                                |                                                 |                |                |                      |                |         |               |                |         |                |                                                                                                                                                                                                     |        |                       |                                  |                 |                     |                                                                                                                                                                                                                                                                                                                                                                                                                                                                              |                                                                                                                                                                                                                                                                                                                                               |                         |                |                |                          |        |                                             |                |        |                   |                              |         |                                                     |                     |       |                                                                                                                                                                                                                                                                                                                                                                                                                                                                                                                |  |                |                |                                                 |        |        |                          |        |        |                                                   |        |        |                                  |        |        |                                                                                                                                                                                              |  |                |                |
| Mean % change in BMD from baseline (week 96):                                                                                                                                                                                                                                                                                                                                                                                                                                                                                                                                                                                                                                                                                                                                                                                                                                |                    |                        |                                                                                                                                                                                                                                                                                                                                                                                                                                                                                          |                                                       |                                                                |                                                 |                |                |                      |                |         |               |                |         |                |                                                                                                                                                                                                     |        |                       |                                  |                 |                     |                                                                                                                                                                                                                                                                                                                                                                                                                                                                              |                                                                                                                                                                                                                                                                                                                                               |                         |                |                |                          |        |                                             |                |        |                   |                              |         |                                                     |                     |       |                                                                                                                                                                                                                                                                                                                                                                                                                                                                                                                |  |                |                |                                                 |        |        |                          |        |        |                                                   |        |        |                                  |        |        |                                                                                                                                                                                              |  |                |                |
| <table border="1"> <thead> <tr> <th></th> <th>2-drug regimen</th> <th>3-drug regimen</th> </tr> </thead> <tbody> <tr> <td>Lumbar spine (%)</td> <td>-0.43</td> <td>-2.80**</td> </tr> <tr> <td>Total hip (%)</td> <td>-1.57*</td> <td>-3.80**</td> </tr> <tr> <td>Femoral Neck</td> <td>-1.74**</td> <td>-5.99*</td> </tr> </tbody> </table>                                                                                                                                                                                                                                                                                                                                                                                                                                                                                                                                 |                    |                        |                                                                                                                                                                                                                                                                                                                                                                                                                                                                                          |                                                       |                                                                |                                                 | 2-drug regimen | 3-drug regimen | Lumbar spine (%)     | -0.43          | -2.80** | Total hip (%) | -1.57*         | -3.80** | Femoral Neck   | -1.74**                                                                                                                                                                                             | -5.99* |                       |                                  |                 |                     |                                                                                                                                                                                                                                                                                                                                                                                                                                                                              |                                                                                                                                                                                                                                                                                                                                               |                         |                |                |                          |        |                                             |                |        |                   |                              |         |                                                     |                     |       |                                                                                                                                                                                                                                                                                                                                                                                                                                                                                                                |  |                |                |                                                 |        |        |                          |        |        |                                                   |        |        |                                  |        |        |                                                                                                                                                                                              |  |                |                |
|                                                                                                                                                                                                                                                                                                                                                                                                                                                                                                                                                                                                                                                                                                                                                                                                                                                                              | 2-drug regimen     | 3-drug regimen         |                                                                                                                                                                                                                                                                                                                                                                                                                                                                                          |                                                       |                                                                |                                                 |                |                |                      |                |         |               |                |         |                |                                                                                                                                                                                                     |        |                       |                                  |                 |                     |                                                                                                                                                                                                                                                                                                                                                                                                                                                                              |                                                                                                                                                                                                                                                                                                                                               |                         |                |                |                          |        |                                             |                |        |                   |                              |         |                                                     |                     |       |                                                                                                                                                                                                                                                                                                                                                                                                                                                                                                                |  |                |                |                                                 |        |        |                          |        |        |                                                   |        |        |                                  |        |        |                                                                                                                                                                                              |  |                |                |
| Lumbar spine (%)                                                                                                                                                                                                                                                                                                                                                                                                                                                                                                                                                                                                                                                                                                                                                                                                                                                             | -0.43              | -2.80**                |                                                                                                                                                                                                                                                                                                                                                                                                                                                                                          |                                                       |                                                                |                                                 |                |                |                      |                |         |               |                |         |                |                                                                                                                                                                                                     |        |                       |                                  |                 |                     |                                                                                                                                                                                                                                                                                                                                                                                                                                                                              |                                                                                                                                                                                                                                                                                                                                               |                         |                |                |                          |        |                                             |                |        |                   |                              |         |                                                     |                     |       |                                                                                                                                                                                                                                                                                                                                                                                                                                                                                                                |  |                |                |                                                 |        |        |                          |        |        |                                                   |        |        |                                  |        |        |                                                                                                                                                                                              |  |                |                |
| Total hip (%)                                                                                                                                                                                                                                                                                                                                                                                                                                                                                                                                                                                                                                                                                                                                                                                                                                                                | -1.57*             | -3.80**                |                                                                                                                                                                                                                                                                                                                                                                                                                                                                                          |                                                       |                                                                |                                                 |                |                |                      |                |         |               |                |         |                |                                                                                                                                                                                                     |        |                       |                                  |                 |                     |                                                                                                                                                                                                                                                                                                                                                                                                                                                                              |                                                                                                                                                                                                                                                                                                                                               |                         |                |                |                          |        |                                             |                |        |                   |                              |         |                                                     |                     |       |                                                                                                                                                                                                                                                                                                                                                                                                                                                                                                                |  |                |                |                                                 |        |        |                          |        |        |                                                   |        |        |                                  |        |        |                                                                                                                                                                                              |  |                |                |
| Femoral Neck                                                                                                                                                                                                                                                                                                                                                                                                                                                                                                                                                                                                                                                                                                                                                                                                                                                                 | -1.74**            | -5.99*                 |                                                                                                                                                                                                                                                                                                                                                                                                                                                                                          |                                                       |                                                                |                                                 |                |                |                      |                |         |               |                |         |                |                                                                                                                                                                                                     |        |                       |                                  |                 |                     |                                                                                                                                                                                                                                                                                                                                                                                                                                                                              |                                                                                                                                                                                                                                                                                                                                               |                         |                |                |                          |        |                                             |                |        |                   |                              |         |                                                     |                     |       |                                                                                                                                                                                                                                                                                                                                                                                                                                                                                                                |  |                |                |                                                 |        |        |                          |        |        |                                                   |        |        |                                  |        |        |                                                                                                                                                                                              |  |                |                |
| Mean bone biomarker changes (week 48):                                                                                                                                                                                                                                                                                                                                                                                                                                                                                                                                                                                                                                                                                                                                                                                                                                       |                    |                        |                                                                                                                                                                                                                                                                                                                                                                                                                                                                                          |                                                       |                                                                |                                                 |                |                |                      |                |         |               |                |         |                |                                                                                                                                                                                                     |        |                       |                                  |                 |                     |                                                                                                                                                                                                                                                                                                                                                                                                                                                                              |                                                                                                                                                                                                                                                                                                                                               |                         |                |                |                          |        |                                             |                |        |                   |                              |         |                                                     |                     |       |                                                                                                                                                                                                                                                                                                                                                                                                                                                                                                                |  |                |                |                                                 |        |        |                          |        |        |                                                   |        |        |                                  |        |        |                                                                                                                                                                                              |  |                |                |
| <table border="1"> <thead> <tr> <th></th> <th>2-drug regimen</th> <th>3-drug regimen</th> </tr> </thead> <tbody> <tr> <td>Osteocalcin (ng/mL)*</td> <td>+ 4.8</td> <td>+ 8.6</td> </tr> <tr> <td>BSAP (µg/L)**</td> <td>+ 2.4</td> <td>+ 6.7</td> </tr> <tr> <td>P1NP (ng/mL)**</td> <td>+ 12.0</td> <td>+ 25.8</td> </tr> <tr> <td>Serum CTX-1 (ng/mL)**</td> <td>+ 0.08</td> <td>+ 0.31</td> </tr> <tr> <td>Osteopontin (pg/mL)</td> <td>- 9.3</td> <td>+ 451</td> </tr> <tr> <td>Urine CTX-1/creatinine*</td> <td>+ 59.0</td> <td>+ 119</td> </tr> <tr> <td>Osteoprotegerin (pg/mL)*</td> <td>+ 63.6</td> <td>- 29.5</td> </tr> <tr> <td>RANKL (pmol/L)</td> <td>- 0.28</td> <td>- 0.15</td> </tr> <tr> <td>25-hydroxy vitamin D (ng/mL)</td> <td>+ 4.4</td> <td>+ 6.1</td> </tr> <tr> <td>Intact PTH (pg/mL)*</td> <td>+ 0.5</td> <td>+ 7.3</td> </tr> </tbody> </table> |                    |                        |                                                                                                                                                                                                                                                                                                                                                                                                                                                                                          |                                                       |                                                                |                                                 | 2-drug regimen | 3-drug regimen | Osteocalcin (ng/mL)* | + 4.8          | + 8.6   | BSAP (µg/L)** | + 2.4          | + 6.7   | P1NP (ng/mL)** | + 12.0                                                                                                                                                                                              | + 25.8 | Serum CTX-1 (ng/mL)** | + 0.08                           | + 0.31          | Osteopontin (pg/mL) | - 9.3                                                                                                                                                                                                                                                                                                                                                                                                                                                                        | + 451                                                                                                                                                                                                                                                                                                                                         | Urine CTX-1/creatinine* | + 59.0         | + 119          | Osteoprotegerin (pg/mL)* | + 63.6 | - 29.5                                      | RANKL (pmol/L) | - 0.28 | - 0.15            | 25-hydroxy vitamin D (ng/mL) | + 4.4   | + 6.1                                               | Intact PTH (pg/mL)* | + 0.5 | + 7.3                                                                                                                                                                                                                                                                                                                                                                                                                                                                                                          |  |                |                |                                                 |        |        |                          |        |        |                                                   |        |        |                                  |        |        |                                                                                                                                                                                              |  |                |                |
|                                                                                                                                                                                                                                                                                                                                                                                                                                                                                                                                                                                                                                                                                                                                                                                                                                                                              | 2-drug regimen     | 3-drug regimen         |                                                                                                                                                                                                                                                                                                                                                                                                                                                                                          |                                                       |                                                                |                                                 |                |                |                      |                |         |               |                |         |                |                                                                                                                                                                                                     |        |                       |                                  |                 |                     |                                                                                                                                                                                                                                                                                                                                                                                                                                                                              |                                                                                                                                                                                                                                                                                                                                               |                         |                |                |                          |        |                                             |                |        |                   |                              |         |                                                     |                     |       |                                                                                                                                                                                                                                                                                                                                                                                                                                                                                                                |  |                |                |                                                 |        |        |                          |        |        |                                                   |        |        |                                  |        |        |                                                                                                                                                                                              |  |                |                |
| Osteocalcin (ng/mL)*                                                                                                                                                                                                                                                                                                                                                                                                                                                                                                                                                                                                                                                                                                                                                                                                                                                         | + 4.8              | + 8.6                  |                                                                                                                                                                                                                                                                                                                                                                                                                                                                                          |                                                       |                                                                |                                                 |                |                |                      |                |         |               |                |         |                |                                                                                                                                                                                                     |        |                       |                                  |                 |                     |                                                                                                                                                                                                                                                                                                                                                                                                                                                                              |                                                                                                                                                                                                                                                                                                                                               |                         |                |                |                          |        |                                             |                |        |                   |                              |         |                                                     |                     |       |                                                                                                                                                                                                                                                                                                                                                                                                                                                                                                                |  |                |                |                                                 |        |        |                          |        |        |                                                   |        |        |                                  |        |        |                                                                                                                                                                                              |  |                |                |
| BSAP (µg/L)**                                                                                                                                                                                                                                                                                                                                                                                                                                                                                                                                                                                                                                                                                                                                                                                                                                                                | + 2.4              | + 6.7                  |                                                                                                                                                                                                                                                                                                                                                                                                                                                                                          |                                                       |                                                                |                                                 |                |                |                      |                |         |               |                |         |                |                                                                                                                                                                                                     |        |                       |                                  |                 |                     |                                                                                                                                                                                                                                                                                                                                                                                                                                                                              |                                                                                                                                                                                                                                                                                                                                               |                         |                |                |                          |        |                                             |                |        |                   |                              |         |                                                     |                     |       |                                                                                                                                                                                                                                                                                                                                                                                                                                                                                                                |  |                |                |                                                 |        |        |                          |        |        |                                                   |        |        |                                  |        |        |                                                                                                                                                                                              |  |                |                |
| P1NP (ng/mL)**                                                                                                                                                                                                                                                                                                                                                                                                                                                                                                                                                                                                                                                                                                                                                                                                                                                               | + 12.0             | + 25.8                 |                                                                                                                                                                                                                                                                                                                                                                                                                                                                                          |                                                       |                                                                |                                                 |                |                |                      |                |         |               |                |         |                |                                                                                                                                                                                                     |        |                       |                                  |                 |                     |                                                                                                                                                                                                                                                                                                                                                                                                                                                                              |                                                                                                                                                                                                                                                                                                                                               |                         |                |                |                          |        |                                             |                |        |                   |                              |         |                                                     |                     |       |                                                                                                                                                                                                                                                                                                                                                                                                                                                                                                                |  |                |                |                                                 |        |        |                          |        |        |                                                   |        |        |                                  |        |        |                                                                                                                                                                                              |  |                |                |
| Serum CTX-1 (ng/mL)**                                                                                                                                                                                                                                                                                                                                                                                                                                                                                                                                                                                                                                                                                                                                                                                                                                                        | + 0.08             | + 0.31                 |                                                                                                                                                                                                                                                                                                                                                                                                                                                                                          |                                                       |                                                                |                                                 |                |                |                      |                |         |               |                |         |                |                                                                                                                                                                                                     |        |                       |                                  |                 |                     |                                                                                                                                                                                                                                                                                                                                                                                                                                                                              |                                                                                                                                                                                                                                                                                                                                               |                         |                |                |                          |        |                                             |                |        |                   |                              |         |                                                     |                     |       |                                                                                                                                                                                                                                                                                                                                                                                                                                                                                                                |  |                |                |                                                 |        |        |                          |        |        |                                                   |        |        |                                  |        |        |                                                                                                                                                                                              |  |                |                |
| Osteopontin (pg/mL)                                                                                                                                                                                                                                                                                                                                                                                                                                                                                                                                                                                                                                                                                                                                                                                                                                                          | - 9.3              | + 451                  |                                                                                                                                                                                                                                                                                                                                                                                                                                                                                          |                                                       |                                                                |                                                 |                |                |                      |                |         |               |                |         |                |                                                                                                                                                                                                     |        |                       |                                  |                 |                     |                                                                                                                                                                                                                                                                                                                                                                                                                                                                              |                                                                                                                                                                                                                                                                                                                                               |                         |                |                |                          |        |                                             |                |        |                   |                              |         |                                                     |                     |       |                                                                                                                                                                                                                                                                                                                                                                                                                                                                                                                |  |                |                |                                                 |        |        |                          |        |        |                                                   |        |        |                                  |        |        |                                                                                                                                                                                              |  |                |                |
| Urine CTX-1/creatinine*                                                                                                                                                                                                                                                                                                                                                                                                                                                                                                                                                                                                                                                                                                                                                                                                                                                      | + 59.0             | + 119                  |                                                                                                                                                                                                                                                                                                                                                                                                                                                                                          |                                                       |                                                                |                                                 |                |                |                      |                |         |               |                |         |                |                                                                                                                                                                                                     |        |                       |                                  |                 |                     |                                                                                                                                                                                                                                                                                                                                                                                                                                                                              |                                                                                                                                                                                                                                                                                                                                               |                         |                |                |                          |        |                                             |                |        |                   |                              |         |                                                     |                     |       |                                                                                                                                                                                                                                                                                                                                                                                                                                                                                                                |  |                |                |                                                 |        |        |                          |        |        |                                                   |        |        |                                  |        |        |                                                                                                                                                                                              |  |                |                |
| Osteoprotegerin (pg/mL)*                                                                                                                                                                                                                                                                                                                                                                                                                                                                                                                                                                                                                                                                                                                                                                                                                                                     | + 63.6             | - 29.5                 |                                                                                                                                                                                                                                                                                                                                                                                                                                                                                          |                                                       |                                                                |                                                 |                |                |                      |                |         |               |                |         |                |                                                                                                                                                                                                     |        |                       |                                  |                 |                     |                                                                                                                                                                                                                                                                                                                                                                                                                                                                              |                                                                                                                                                                                                                                                                                                                                               |                         |                |                |                          |        |                                             |                |        |                   |                              |         |                                                     |                     |       |                                                                                                                                                                                                                                                                                                                                                                                                                                                                                                                |  |                |                |                                                 |        |        |                          |        |        |                                                   |        |        |                                  |        |        |                                                                                                                                                                                              |  |                |                |
| RANKL (pmol/L)                                                                                                                                                                                                                                                                                                                                                                                                                                                                                                                                                                                                                                                                                                                                                                                                                                                               | - 0.28             | - 0.15                 |                                                                                                                                                                                                                                                                                                                                                                                                                                                                                          |                                                       |                                                                |                                                 |                |                |                      |                |         |               |                |         |                |                                                                                                                                                                                                     |        |                       |                                  |                 |                     |                                                                                                                                                                                                                                                                                                                                                                                                                                                                              |                                                                                                                                                                                                                                                                                                                                               |                         |                |                |                          |        |                                             |                |        |                   |                              |         |                                                     |                     |       |                                                                                                                                                                                                                                                                                                                                                                                                                                                                                                                |  |                |                |                                                 |        |        |                          |        |        |                                                   |        |        |                                  |        |        |                                                                                                                                                                                              |  |                |                |
| 25-hydroxy vitamin D (ng/mL)                                                                                                                                                                                                                                                                                                                                                                                                                                                                                                                                                                                                                                                                                                                                                                                                                                                 | + 4.4              | + 6.1                  |                                                                                                                                                                                                                                                                                                                                                                                                                                                                                          |                                                       |                                                                |                                                 |                |                |                      |                |         |               |                |         |                |                                                                                                                                                                                                     |        |                       |                                  |                 |                     |                                                                                                                                                                                                                                                                                                                                                                                                                                                                              |                                                                                                                                                                                                                                                                                                                                               |                         |                |                |                          |        |                                             |                |        |                   |                              |         |                                                     |                     |       |                                                                                                                                                                                                                                                                                                                                                                                                                                                                                                                |  |                |                |                                                 |        |        |                          |        |        |                                                   |        |        |                                  |        |        |                                                                                                                                                                                              |  |                |                |
| Intact PTH (pg/mL)*                                                                                                                                                                                                                                                                                                                                                                                                                                                                                                                                                                                                                                                                                                                                                                                                                                                          | + 0.5              | + 7.3                  |                                                                                                                                                                                                                                                                                                                                                                                                                                                                                          |                                                       |                                                                |                                                 |                |                |                      |                |         |               |                |         |                |                                                                                                                                                                                                     |        |                       |                                  |                 |                     |                                                                                                                                                                                                                                                                                                                                                                                                                                                                              |                                                                                                                                                                                                                                                                                                                                               |                         |                |                |                          |        |                                             |                |        |                   |                              |         |                                                     |                     |       |                                                                                                                                                                                                                                                                                                                                                                                                                                                                                                                |  |                |                |                                                 |        |        |                          |        |        |                                                   |        |        |                                  |        |        |                                                                                                                                                                                              |  |                |                |
| <b>Switch Studies of Virologically Suppressed PLWHIV</b>                                                                                                                                                                                                                                                                                                                                                                                                                                                                                                                                                                                                                                                                                                                                                                                                                     |                    |                        |                                                                                                                                                                                                                                                                                                                                                                                                                                                                                          |                                                       |                                                                |                                                 |                |                |                      |                |         |               |                |         |                |                                                                                                                                                                                                     |        |                       |                                  |                 |                     |                                                                                                                                                                                                                                                                                                                                                                                                                                                                              |                                                                                                                                                                                                                                                                                                                                               |                         |                |                |                          |        |                                             |                |        |                   |                              |         |                                                     |                     |       |                                                                                                                                                                                                                                                                                                                                                                                                                                                                                                                |  |                |                |                                                 |        |        |                          |        |        |                                                   |        |        |                                  |        |        |                                                                                                                                                                                              |  |                |                |
| Study                                                                                                                                                                                                                                                                                                                                                                                                                                                                                                                                                                                                                                                                                                                                                                                                                                                                        | 2-Drug ART Regimen | Comparator ART Regimen | Lipids                                                                                                                                                                                                                                                                                                                                                                                                                                                                                   | Renal                                                 | Bone                                                           |                                                 |                |                |                      |                |         |               |                |         |                |                                                                                                                                                                                                     |        |                       |                                  |                 |                     |                                                                                                                                                                                                                                                                                                                                                                                                                                                                              |                                                                                                                                                                                                                                                                                                                                               |                         |                |                |                          |        |                                             |                |        |                   |                              |         |                                                     |                     |       |                                                                                                                                                                                                                                                                                                                                                                                                                                                                                                                |  |                |                |                                                 |        |        |                          |        |        |                                                   |        |        |                                  |        |        |                                                                                                                                                                                              |  |                |                |
| DTG + 3TC                                                                                                                                                                                                                                                                                                                                                                                                                                                                                                                                                                                                                                                                                                                                                                                                                                                                    |                    |                        |                                                                                                                                                                                                                                                                                                                                                                                                                                                                                          |                                                       |                                                                |                                                 |                |                |                      |                |         |               |                |         |                |                                                                                                                                                                                                     |        |                       |                                  |                 |                     |                                                                                                                                                                                                                                                                                                                                                                                                                                                                              |                                                                                                                                                                                                                                                                                                                                               |                         |                |                |                          |        |                                             |                |        |                   |                              |         |                                                     |                     |       |                                                                                                                                                                                                                                                                                                                                                                                                                                                                                                                |  |                |                |                                                 |        |        |                          |        |        |                                                   |        |        |                                  |        |        |                                                                                                                                                                                              |  |                |                |

| TANGO <sup>20,21</sup>                            | DTG/ 3TC             | Current TAF- based triple therapy regimen | Mean change in lipids from baseline (week 48):                                                                                                                                                                                                                                                                                                                                                                                       | Mean change in renal markers from baseline (week 48): | Not reported | Mean change in measures of insulin resistance (week 48):                                                                                                                                                                       |                |                  |                |             |                      |                    |       |                             |        |       |                           |       |       |                                                                                                                                                                                                                                                                                                                                                                                                                                                                                                                                                                                                                                                                           |  |                |                |               |        |        |                                              |        |       |                                                   |       |       |                                |       |       |                                             |       |       |                                     |       |       |                                                                                                                                                                                                                                                                                                                                                              |  |                |                |                             |      |      |                                   |     |
|---------------------------------------------------|----------------------|-------------------------------------------|--------------------------------------------------------------------------------------------------------------------------------------------------------------------------------------------------------------------------------------------------------------------------------------------------------------------------------------------------------------------------------------------------------------------------------------|-------------------------------------------------------|--------------|--------------------------------------------------------------------------------------------------------------------------------------------------------------------------------------------------------------------------------|----------------|------------------|----------------|-------------|----------------------|--------------------|-------|-----------------------------|--------|-------|---------------------------|-------|-------|---------------------------------------------------------------------------------------------------------------------------------------------------------------------------------------------------------------------------------------------------------------------------------------------------------------------------------------------------------------------------------------------------------------------------------------------------------------------------------------------------------------------------------------------------------------------------------------------------------------------------------------------------------------------------|--|----------------|----------------|---------------|--------|--------|----------------------------------------------|--------|-------|---------------------------------------------------|-------|-------|--------------------------------|-------|-------|---------------------------------------------|-------|-------|-------------------------------------|-------|-------|--------------------------------------------------------------------------------------------------------------------------------------------------------------------------------------------------------------------------------------------------------------------------------------------------------------------------------------------------------------|--|----------------|----------------|-----------------------------|------|------|-----------------------------------|-----|
|                                                   |                      |                                           | <table border="1"> <thead> <tr> <th></th> <th>2-drug regimen</th> <th>3-drug regimen</th> </tr> </thead> <tbody> <tr> <td>TC (% change) **</td> <td>- 4.5</td> <td>+ 2.3</td> </tr> <tr> <td>LDL (% change) **</td> <td>- 5.5</td> <td>+ 2.2</td> </tr> <tr> <td>Triglycerides (% change) **</td> <td>- 15.3</td> <td>+ 6.0</td> </tr> <tr> <td>TC/HDL Ratio (% change) *</td> <td>- 3.3</td> <td>- 0.5</td> </tr> </tbody> </table> |                                                       |              | 2-drug regimen                                                                                                                                                                                                                 | 3-drug regimen | TC (% change) ** | - 4.5          | + 2.3       | LDL (% change) **    | - 5.5              | + 2.2 | Triglycerides (% change) ** | - 15.3 | + 6.0 | TC/HDL Ratio (% change) * | - 3.3 | - 0.5 | <table border="1"> <thead> <tr> <th></th> <th>2-drug regimen</th> <th>3-drug regimen</th> </tr> </thead> <tbody> <tr> <td>Cr (µmol/L) *</td> <td>+ 6.67</td> <td>+ 2.12</td> </tr> <tr> <td>GFR from Cr (mL/min/1.73 m<sup>2</sup>) **</td> <td>- 7.78</td> <td>- 3.0</td> </tr> <tr> <td>GFR from cystatin C (mL/min/1.73 m<sup>2</sup>)</td> <td>+ 0.1</td> <td>- 1.6</td> </tr> <tr> <td>Urine protein/Cr ratio (g/mol)</td> <td>- 2.9</td> <td>+ 1.6</td> </tr> <tr> <td>Retinol binding protein/ Cr ratio (µg/mmol)</td> <td>+ 6.3</td> <td>+ 6.7</td> </tr> <tr> <td>B2 microglobulin/Cr ratio (mg/mmol)</td> <td>- 2.2</td> <td>- 7.8</td> </tr> </tbody> </table> |  | 2-drug regimen | 3-drug regimen | Cr (µmol/L) * | + 6.67 | + 2.12 | GFR from Cr (mL/min/1.73 m <sup>2</sup> ) ** | - 7.78 | - 3.0 | GFR from cystatin C (mL/min/1.73 m <sup>2</sup> ) | + 0.1 | - 1.6 | Urine protein/Cr ratio (g/mol) | - 2.9 | + 1.6 | Retinol binding protein/ Cr ratio (µg/mmol) | + 6.3 | + 6.7 | B2 microglobulin/Cr ratio (mg/mmol) | - 2.2 | - 7.8 | <table border="1"> <thead> <tr> <th></th> <th>2-drug regimen</th> <th>3-drug regimen</th> </tr> </thead> <tbody> <tr> <td>Generic mean HOMA-IR (%) **</td> <td>-9.7</td> <td>+4.5</td> </tr> <tr> <td>Insulin Resistance (% increase) *</td> <td>65%</td> <td>74%</td> </tr> <tr> <td>Fasting glucose</td> <td>2.3</td> <td>3.8</td> </tr> </tbody> </table> |  | 2-drug regimen | 3-drug regimen | Generic mean HOMA-IR (%) ** | -9.7 | +4.5 | Insulin Resistance (% increase) * | 65% |
|                                                   | 2-drug regimen       | 3-drug regimen                            |                                                                                                                                                                                                                                                                                                                                                                                                                                      |                                                       |              |                                                                                                                                                                                                                                |                |                  |                |             |                      |                    |       |                             |        |       |                           |       |       |                                                                                                                                                                                                                                                                                                                                                                                                                                                                                                                                                                                                                                                                           |  |                |                |               |        |        |                                              |        |       |                                                   |       |       |                                |       |       |                                             |       |       |                                     |       |       |                                                                                                                                                                                                                                                                                                                                                              |  |                |                |                             |      |      |                                   |     |
| TC (% change) **                                  | - 4.5                | + 2.3                                     |                                                                                                                                                                                                                                                                                                                                                                                                                                      |                                                       |              |                                                                                                                                                                                                                                |                |                  |                |             |                      |                    |       |                             |        |       |                           |       |       |                                                                                                                                                                                                                                                                                                                                                                                                                                                                                                                                                                                                                                                                           |  |                |                |               |        |        |                                              |        |       |                                                   |       |       |                                |       |       |                                             |       |       |                                     |       |       |                                                                                                                                                                                                                                                                                                                                                              |  |                |                |                             |      |      |                                   |     |
| LDL (% change) **                                 | - 5.5                | + 2.2                                     |                                                                                                                                                                                                                                                                                                                                                                                                                                      |                                                       |              |                                                                                                                                                                                                                                |                |                  |                |             |                      |                    |       |                             |        |       |                           |       |       |                                                                                                                                                                                                                                                                                                                                                                                                                                                                                                                                                                                                                                                                           |  |                |                |               |        |        |                                              |        |       |                                                   |       |       |                                |       |       |                                             |       |       |                                     |       |       |                                                                                                                                                                                                                                                                                                                                                              |  |                |                |                             |      |      |                                   |     |
| Triglycerides (% change) **                       | - 15.3               | + 6.0                                     |                                                                                                                                                                                                                                                                                                                                                                                                                                      |                                                       |              |                                                                                                                                                                                                                                |                |                  |                |             |                      |                    |       |                             |        |       |                           |       |       |                                                                                                                                                                                                                                                                                                                                                                                                                                                                                                                                                                                                                                                                           |  |                |                |               |        |        |                                              |        |       |                                                   |       |       |                                |       |       |                                             |       |       |                                     |       |       |                                                                                                                                                                                                                                                                                                                                                              |  |                |                |                             |      |      |                                   |     |
| TC/HDL Ratio (% change) *                         | - 3.3                | - 0.5                                     |                                                                                                                                                                                                                                                                                                                                                                                                                                      |                                                       |              |                                                                                                                                                                                                                                |                |                  |                |             |                      |                    |       |                             |        |       |                           |       |       |                                                                                                                                                                                                                                                                                                                                                                                                                                                                                                                                                                                                                                                                           |  |                |                |               |        |        |                                              |        |       |                                                   |       |       |                                |       |       |                                             |       |       |                                     |       |       |                                                                                                                                                                                                                                                                                                                                                              |  |                |                |                             |      |      |                                   |     |
|                                                   | 2-drug regimen       | 3-drug regimen                            |                                                                                                                                                                                                                                                                                                                                                                                                                                      |                                                       |              |                                                                                                                                                                                                                                |                |                  |                |             |                      |                    |       |                             |        |       |                           |       |       |                                                                                                                                                                                                                                                                                                                                                                                                                                                                                                                                                                                                                                                                           |  |                |                |               |        |        |                                              |        |       |                                                   |       |       |                                |       |       |                                             |       |       |                                     |       |       |                                                                                                                                                                                                                                                                                                                                                              |  |                |                |                             |      |      |                                   |     |
| Cr (µmol/L) *                                     | + 6.67               | + 2.12                                    |                                                                                                                                                                                                                                                                                                                                                                                                                                      |                                                       |              |                                                                                                                                                                                                                                |                |                  |                |             |                      |                    |       |                             |        |       |                           |       |       |                                                                                                                                                                                                                                                                                                                                                                                                                                                                                                                                                                                                                                                                           |  |                |                |               |        |        |                                              |        |       |                                                   |       |       |                                |       |       |                                             |       |       |                                     |       |       |                                                                                                                                                                                                                                                                                                                                                              |  |                |                |                             |      |      |                                   |     |
| GFR from Cr (mL/min/1.73 m <sup>2</sup> ) **      | - 7.78               | - 3.0                                     |                                                                                                                                                                                                                                                                                                                                                                                                                                      |                                                       |              |                                                                                                                                                                                                                                |                |                  |                |             |                      |                    |       |                             |        |       |                           |       |       |                                                                                                                                                                                                                                                                                                                                                                                                                                                                                                                                                                                                                                                                           |  |                |                |               |        |        |                                              |        |       |                                                   |       |       |                                |       |       |                                             |       |       |                                     |       |       |                                                                                                                                                                                                                                                                                                                                                              |  |                |                |                             |      |      |                                   |     |
| GFR from cystatin C (mL/min/1.73 m <sup>2</sup> ) | + 0.1                | - 1.6                                     |                                                                                                                                                                                                                                                                                                                                                                                                                                      |                                                       |              |                                                                                                                                                                                                                                |                |                  |                |             |                      |                    |       |                             |        |       |                           |       |       |                                                                                                                                                                                                                                                                                                                                                                                                                                                                                                                                                                                                                                                                           |  |                |                |               |        |        |                                              |        |       |                                                   |       |       |                                |       |       |                                             |       |       |                                     |       |       |                                                                                                                                                                                                                                                                                                                                                              |  |                |                |                             |      |      |                                   |     |
| Urine protein/Cr ratio (g/mol)                    | - 2.9                | + 1.6                                     |                                                                                                                                                                                                                                                                                                                                                                                                                                      |                                                       |              |                                                                                                                                                                                                                                |                |                  |                |             |                      |                    |       |                             |        |       |                           |       |       |                                                                                                                                                                                                                                                                                                                                                                                                                                                                                                                                                                                                                                                                           |  |                |                |               |        |        |                                              |        |       |                                                   |       |       |                                |       |       |                                             |       |       |                                     |       |       |                                                                                                                                                                                                                                                                                                                                                              |  |                |                |                             |      |      |                                   |     |
| Retinol binding protein/ Cr ratio (µg/mmol)       | + 6.3                | + 6.7                                     |                                                                                                                                                                                                                                                                                                                                                                                                                                      |                                                       |              |                                                                                                                                                                                                                                |                |                  |                |             |                      |                    |       |                             |        |       |                           |       |       |                                                                                                                                                                                                                                                                                                                                                                                                                                                                                                                                                                                                                                                                           |  |                |                |               |        |        |                                              |        |       |                                                   |       |       |                                |       |       |                                             |       |       |                                     |       |       |                                                                                                                                                                                                                                                                                                                                                              |  |                |                |                             |      |      |                                   |     |
| B2 microglobulin/Cr ratio (mg/mmol)               | - 2.2                | - 7.8                                     |                                                                                                                                                                                                                                                                                                                                                                                                                                      |                                                       |              |                                                                                                                                                                                                                                |                |                  |                |             |                      |                    |       |                             |        |       |                           |       |       |                                                                                                                                                                                                                                                                                                                                                                                                                                                                                                                                                                                                                                                                           |  |                |                |               |        |        |                                              |        |       |                                                   |       |       |                                |       |       |                                             |       |       |                                     |       |       |                                                                                                                                                                                                                                                                                                                                                              |  |                |                |                             |      |      |                                   |     |
|                                                   | 2-drug regimen       | 3-drug regimen                            |                                                                                                                                                                                                                                                                                                                                                                                                                                      |                                                       |              |                                                                                                                                                                                                                                |                |                  |                |             |                      |                    |       |                             |        |       |                           |       |       |                                                                                                                                                                                                                                                                                                                                                                                                                                                                                                                                                                                                                                                                           |  |                |                |               |        |        |                                              |        |       |                                                   |       |       |                                |       |       |                                             |       |       |                                     |       |       |                                                                                                                                                                                                                                                                                                                                                              |  |                |                |                             |      |      |                                   |     |
| Generic mean HOMA-IR (%) **                       | -9.7                 | +4.5                                      |                                                                                                                                                                                                                                                                                                                                                                                                                                      |                                                       |              |                                                                                                                                                                                                                                |                |                  |                |             |                      |                    |       |                             |        |       |                           |       |       |                                                                                                                                                                                                                                                                                                                                                                                                                                                                                                                                                                                                                                                                           |  |                |                |               |        |        |                                              |        |       |                                                   |       |       |                                |       |       |                                             |       |       |                                     |       |       |                                                                                                                                                                                                                                                                                                                                                              |  |                |                |                             |      |      |                                   |     |
| Insulin Resistance (% increase) *                 | 65%                  | 74%                                       |                                                                                                                                                                                                                                                                                                                                                                                                                                      |                                                       |              |                                                                                                                                                                                                                                |                |                  |                |             |                      |                    |       |                             |        |       |                           |       |       |                                                                                                                                                                                                                                                                                                                                                                                                                                                                                                                                                                                                                                                                           |  |                |                |               |        |        |                                              |        |       |                                                   |       |       |                                |       |       |                                             |       |       |                                     |       |       |                                                                                                                                                                                                                                                                                                                                                              |  |                |                |                             |      |      |                                   |     |
| Fasting glucose                                   | 2.3                  | 3.8                                       |                                                                                                                                                                                                                                                                                                                                                                                                                                      |                                                       |              |                                                                                                                                                                                                                                |                |                  |                |             |                      |                    |       |                             |        |       |                           |       |       |                                                                                                                                                                                                                                                                                                                                                                                                                                                                                                                                                                                                                                                                           |  |                |                |               |        |        |                                              |        |       |                                                   |       |       |                                |       |       |                                             |       |       |                                     |       |       |                                                                                                                                                                                                                                                                                                                                                              |  |                |                |                             |      |      |                                   |     |
|                                                   |                      |                                           | Mean change in weight from baseline (week 144):                                                                                                                                                                                                                                                                                                                                                                                      |                                                       |              | <table border="1"> <thead> <tr> <th></th> <th>2-drug regimen</th> <th>3-drug regimen</th> </tr> </thead> <tbody> <tr> <td>Weight (kg)</td> <td>+ 2.2<br/>[-0.8, 5.6]</td> <td>1.3<br/>[-1.5, 5.0]</td> </tr> </tbody> </table> |                | 2-drug regimen   | 3-drug regimen | Weight (kg) | + 2.2<br>[-0.8, 5.6] | 1.3<br>[-1.5, 5.0] |       |                             |        |       |                           |       |       |                                                                                                                                                                                                                                                                                                                                                                                                                                                                                                                                                                                                                                                                           |  |                |                |               |        |        |                                              |        |       |                                                   |       |       |                                |       |       |                                             |       |       |                                     |       |       |                                                                                                                                                                                                                                                                                                                                                              |  |                |                |                             |      |      |                                   |     |
|                                                   | 2-drug regimen       | 3-drug regimen                            |                                                                                                                                                                                                                                                                                                                                                                                                                                      |                                                       |              |                                                                                                                                                                                                                                |                |                  |                |             |                      |                    |       |                             |        |       |                           |       |       |                                                                                                                                                                                                                                                                                                                                                                                                                                                                                                                                                                                                                                                                           |  |                |                |               |        |        |                                              |        |       |                                                   |       |       |                                |       |       |                                             |       |       |                                     |       |       |                                                                                                                                                                                                                                                                                                                                                              |  |                |                |                             |      |      |                                   |     |
| Weight (kg)                                       | + 2.2<br>[-0.8, 5.6] | 1.3<br>[-1.5, 5.0]                        |                                                                                                                                                                                                                                                                                                                                                                                                                                      |                                                       |              |                                                                                                                                                                                                                                |                |                  |                |             |                      |                    |       |                             |        |       |                           |       |       |                                                                                                                                                                                                                                                                                                                                                                                                                                                                                                                                                                                                                                                                           |  |                |                |               |        |        |                                              |        |       |                                                   |       |       |                                |       |       |                                             |       |       |                                     |       |       |                                                                                                                                                                                                                                                                                                                                                              |  |                |                |                             |      |      |                                   |     |

| DOLAM <sup>22</sup>    | DTG + 3TC                                             | Current standard 3 Drug ART | Mean change in lipids from baseline (week 48):                                                                                                                                                                                                                                                                                                                                                        | Mean change in eGFR from baseline (week 48): | Not reported | Mean change in weight from baseline (week 48): |                |             |       |       |              |          |         |              |     |       |              |           |        |                                                                                                                                                                                                                                                                                                                             |  |                                                       |                        |       |                       |       |                       |       |                                                                                                                                                                                                  |  |                |
|------------------------|-------------------------------------------------------|-----------------------------|-------------------------------------------------------------------------------------------------------------------------------------------------------------------------------------------------------------------------------------------------------------------------------------------------------------------------------------------------------------------------------------------------------|----------------------------------------------|--------------|------------------------------------------------|----------------|-------------|-------|-------|--------------|----------|---------|--------------|-----|-------|--------------|-----------|--------|-----------------------------------------------------------------------------------------------------------------------------------------------------------------------------------------------------------------------------------------------------------------------------------------------------------------------------|--|-------------------------------------------------------|------------------------|-------|-----------------------|-------|-----------------------|-------|--------------------------------------------------------------------------------------------------------------------------------------------------------------------------------------------------|--|----------------|
|                        |                                                       |                             | <table border="1"> <thead> <tr> <th></th> <th>2-drug regimen</th> <th>3-drug regimen</th> </tr> </thead> <tbody> <tr> <td>TC (mmol/L)</td> <td>- 3.0</td> <td>+ 1.0</td> </tr> <tr> <td>HDL (mmol/L)</td> <td>+ 1.0 **</td> <td>+ 3.0 *</td> </tr> <tr> <td>LDL (mmol/L)</td> <td>0.0</td> <td>+ 5.0</td> </tr> <tr> <td>TC/HDL ratio</td> <td>- 0.31 **</td> <td>- 0.19</td> </tr> </tbody> </table> |                                              |              | 2-drug regimen                                 | 3-drug regimen | TC (mmol/L) | - 3.0 | + 1.0 | HDL (mmol/L) | + 1.0 ** | + 3.0 * | LDL (mmol/L) | 0.0 | + 5.0 | TC/HDL ratio | - 0.31 ** | - 0.19 | <table border="1"> <thead> <tr> <th></th> <th>Mean change in eGFR (mL/min per 1.73 m<sup>2</sup>)</th> </tr> </thead> <tbody> <tr> <td>Dual therapy overall *</td> <td>- 3.1</td> </tr> <tr> <td>Switching from TAF **</td> <td>- 7.0</td> </tr> <tr> <td>Switching from ABC **</td> <td>- 4.0</td> </tr> </tbody> </table> |  | Mean change in eGFR (mL/min per 1.73 m <sup>2</sup> ) | Dual therapy overall * | - 3.1 | Switching from TAF ** | - 7.0 | Switching from ABC ** | - 4.0 | <table border="1"> <thead> <tr> <th></th> <th>2-drug regimen</th> <th>3-drug regimen</th> </tr> </thead> <tbody> <tr> <td>Weight (kg) **</td> <td>+1.6</td> <td>0.1</td> </tr> </tbody> </table> |  | 2-drug regimen |
|                        | 2-drug regimen                                        | 3-drug regimen              |                                                                                                                                                                                                                                                                                                                                                                                                       |                                              |              |                                                |                |             |       |       |              |          |         |              |     |       |              |           |        |                                                                                                                                                                                                                                                                                                                             |  |                                                       |                        |       |                       |       |                       |       |                                                                                                                                                                                                  |  |                |
| TC (mmol/L)            | - 3.0                                                 | + 1.0                       |                                                                                                                                                                                                                                                                                                                                                                                                       |                                              |              |                                                |                |             |       |       |              |          |         |              |     |       |              |           |        |                                                                                                                                                                                                                                                                                                                             |  |                                                       |                        |       |                       |       |                       |       |                                                                                                                                                                                                  |  |                |
| HDL (mmol/L)           | + 1.0 **                                              | + 3.0 *                     |                                                                                                                                                                                                                                                                                                                                                                                                       |                                              |              |                                                |                |             |       |       |              |          |         |              |     |       |              |           |        |                                                                                                                                                                                                                                                                                                                             |  |                                                       |                        |       |                       |       |                       |       |                                                                                                                                                                                                  |  |                |
| LDL (mmol/L)           | 0.0                                                   | + 5.0                       |                                                                                                                                                                                                                                                                                                                                                                                                       |                                              |              |                                                |                |             |       |       |              |          |         |              |     |       |              |           |        |                                                                                                                                                                                                                                                                                                                             |  |                                                       |                        |       |                       |       |                       |       |                                                                                                                                                                                                  |  |                |
| TC/HDL ratio           | - 0.31 **                                             | - 0.19                      |                                                                                                                                                                                                                                                                                                                                                                                                       |                                              |              |                                                |                |             |       |       |              |          |         |              |     |       |              |           |        |                                                                                                                                                                                                                                                                                                                             |  |                                                       |                        |       |                       |       |                       |       |                                                                                                                                                                                                  |  |                |
|                        | Mean change in eGFR (mL/min per 1.73 m <sup>2</sup> ) |                             |                                                                                                                                                                                                                                                                                                                                                                                                       |                                              |              |                                                |                |             |       |       |              |          |         |              |     |       |              |           |        |                                                                                                                                                                                                                                                                                                                             |  |                                                       |                        |       |                       |       |                       |       |                                                                                                                                                                                                  |  |                |
| Dual therapy overall * | - 3.1                                                 |                             |                                                                                                                                                                                                                                                                                                                                                                                                       |                                              |              |                                                |                |             |       |       |              |          |         |              |     |       |              |           |        |                                                                                                                                                                                                                                                                                                                             |  |                                                       |                        |       |                       |       |                       |       |                                                                                                                                                                                                  |  |                |
| Switching from TAF **  | - 7.0                                                 |                             |                                                                                                                                                                                                                                                                                                                                                                                                       |                                              |              |                                                |                |             |       |       |              |          |         |              |     |       |              |           |        |                                                                                                                                                                                                                                                                                                                             |  |                                                       |                        |       |                       |       |                       |       |                                                                                                                                                                                                  |  |                |
| Switching from ABC **  | - 4.0                                                 |                             |                                                                                                                                                                                                                                                                                                                                                                                                       |                                              |              |                                                |                |             |       |       |              |          |         |              |     |       |              |           |        |                                                                                                                                                                                                                                                                                                                             |  |                                                       |                        |       |                       |       |                       |       |                                                                                                                                                                                                  |  |                |
|                        | 2-drug regimen                                        | 3-drug regimen              |                                                                                                                                                                                                                                                                                                                                                                                                       |                                              |              |                                                |                |             |       |       |              |          |         |              |     |       |              |           |        |                                                                                                                                                                                                                                                                                                                             |  |                                                       |                        |       |                       |       |                       |       |                                                                                                                                                                                                  |  |                |
| Weight (kg) **         | +1.6                                                  | 0.1                         |                                                                                                                                                                                                                                                                                                                                                                                                       |                                              |              |                                                |                |             |       |       |              |          |         |              |     |       |              |           |        |                                                                                                                                                                                                                                                                                                                             |  |                                                       |                        |       |                       |       |                       |       |                                                                                                                                                                                                  |  |                |
|                        |                                                       |                             | * No significant changes in proteinuria between group                                                                                                                                                                                                                                                                                                                                                 |                                              |              |                                                |                |             |       |       |              |          |         |              |     |       |              |           |        |                                                                                                                                                                                                                                                                                                                             |  |                                                       |                        |       |                       |       |                       |       |                                                                                                                                                                                                  |  |                |

| SALSA <sup>23</sup>                               | DTG/3TC        | Current standard 3 Drug ART | Mean change in lipids from baseline (week 48):                                                                                                                                                                                                                                                                                                                                                                                                                | Mean change in renal biomarkers from baseline (week 48): | Mean change in bone turn-over markers from baseline (week 48): | Mean change in weight & BMI from baseline (week 48): |             |       |       |              |       |       |              |       |       |               |       |       |              |       |       |                                                                                                                                                                                                                                                                                                                                                                                                                                                                                                                                                                                                                                                                                           |  |                |                |             |          |       |                                        |          |         |                                                |         |       |                                 |          |         |                                                   |          |       |                                      |          |        |                                                                                                                                                                                                                                                                                                                                                                                                                                                                                        |  |                |                |                                     |       |       |                         |       |       |                                                 |       |       |                                 |       |       |                                                                                                                                                                                                                                                                      |  |                |                |             |      |     |
|---------------------------------------------------|----------------|-----------------------------|---------------------------------------------------------------------------------------------------------------------------------------------------------------------------------------------------------------------------------------------------------------------------------------------------------------------------------------------------------------------------------------------------------------------------------------------------------------|----------------------------------------------------------|----------------------------------------------------------------|------------------------------------------------------|-------------|-------|-------|--------------|-------|-------|--------------|-------|-------|---------------|-------|-------|--------------|-------|-------|-------------------------------------------------------------------------------------------------------------------------------------------------------------------------------------------------------------------------------------------------------------------------------------------------------------------------------------------------------------------------------------------------------------------------------------------------------------------------------------------------------------------------------------------------------------------------------------------------------------------------------------------------------------------------------------------|--|----------------|----------------|-------------|----------|-------|----------------------------------------|----------|---------|------------------------------------------------|---------|-------|---------------------------------|----------|---------|---------------------------------------------------|----------|-------|--------------------------------------|----------|--------|----------------------------------------------------------------------------------------------------------------------------------------------------------------------------------------------------------------------------------------------------------------------------------------------------------------------------------------------------------------------------------------------------------------------------------------------------------------------------------------|--|----------------|----------------|-------------------------------------|-------|-------|-------------------------|-------|-------|-------------------------------------------------|-------|-------|---------------------------------|-------|-------|----------------------------------------------------------------------------------------------------------------------------------------------------------------------------------------------------------------------------------------------------------------------|--|----------------|----------------|-------------|------|-----|
|                                                   |                |                             | <table border="1"> <thead> <tr> <th></th> <th>2-drug regimen</th> <th>3-drug regimen</th> </tr> </thead> <tbody> <tr> <td>TC (mmol/L)</td> <td>+ 0.6</td> <td>+ 1.6</td> </tr> <tr> <td>HDL (mmol/L)</td> <td>- 1.0</td> <td>+ 1.6</td> </tr> <tr> <td>LDL (mmol/L)</td> <td>+ 2.5</td> <td>+ 2.5</td> </tr> <tr> <td>TRIG (mmol/L)</td> <td>- 3.2</td> <td>- 3.2</td> </tr> <tr> <td>TC/HDL ratio</td> <td>+ 1.8</td> <td>+ 0.2</td> </tr> </tbody> </table> |                                                          | 2-drug regimen                                                 | 3-drug regimen                                       | TC (mmol/L) | + 0.6 | + 1.6 | HDL (mmol/L) | - 1.0 | + 1.6 | LDL (mmol/L) | + 2.5 | + 2.5 | TRIG (mmol/L) | - 3.2 | - 3.2 | TC/HDL ratio | + 1.8 | + 0.2 | <table border="1"> <thead> <tr> <th></th> <th>2-drug regimen</th> <th>3-drug regimen</th> </tr> </thead> <tbody> <tr> <td>Cr (µmol/L)</td> <td>+ 11.6 *</td> <td>+ 5.2</td> </tr> <tr> <td>eGFR, Cr (mL/min/1.73 m<sup>2</sup>)</td> <td>- 12.6 *</td> <td>- 6.1 *</td> </tr> <tr> <td>eGFR, cystatin C (mL/min/1.73 m<sup>2</sup>)</td> <td>- 1.5 *</td> <td>- 0.9</td> </tr> <tr> <td>Urine protein/Cr ratio (g/mol)*</td> <td>- 27.3 *</td> <td>- 9.6 *</td> </tr> <tr> <td>Urine retinol binding protein/Cr ratio (mg/mmol)*</td> <td>- 23.0 *</td> <td>+ 3.6</td> </tr> <tr> <td>B2 microglobulin/Cr ratio (mg/mmol)*</td> <td>- 32.6 *</td> <td>- 11.1</td> </tr> </tbody> </table> |  | 2-drug regimen | 3-drug regimen | Cr (µmol/L) | + 11.6 * | + 5.2 | eGFR, Cr (mL/min/1.73 m <sup>2</sup> ) | - 12.6 * | - 6.1 * | eGFR, cystatin C (mL/min/1.73 m <sup>2</sup> ) | - 1.5 * | - 0.9 | Urine protein/Cr ratio (g/mol)* | - 27.3 * | - 9.6 * | Urine retinol binding protein/Cr ratio (mg/mmol)* | - 23.0 * | + 3.6 | B2 microglobulin/Cr ratio (mg/mmol)* | - 32.6 * | - 11.1 | <table border="1"> <thead> <tr> <th></th> <th>2-drug regimen</th> <th>3-drug regimen</th> </tr> </thead> <tbody> <tr> <td>Bone-specific alkaline phosphatase*</td> <td>-2.86</td> <td>-0.24</td> </tr> <tr> <td>Serum osteocalcin (µL)*</td> <td>-0.94</td> <td>+1.77</td> </tr> <tr> <td>Serum procollagen-1-N-terminal propeptide (µL)*</td> <td>-6.47</td> <td>-0.69</td> </tr> <tr> <td>Type 1 collagen C-peptide (µL)*</td> <td>-0.04</td> <td>+0.03</td> </tr> </tbody> </table> |  | 2-drug regimen | 3-drug regimen | Bone-specific alkaline phosphatase* | -2.86 | -0.24 | Serum osteocalcin (µL)* | -0.94 | +1.77 | Serum procollagen-1-N-terminal propeptide (µL)* | -6.47 | -0.69 | Type 1 collagen C-peptide (µL)* | -0.04 | +0.03 | <table border="1"> <thead> <tr> <th></th> <th>2-drug regimen</th> <th>3-drug regimen</th> </tr> </thead> <tbody> <tr> <td>Weight (kg)</td> <td>+2.1</td> <td>0.6</td> </tr> <tr> <td>BMI (kg/m<sup>2</sup>)</td> <td>+ 0.7</td> <td>0.2</td> </tr> </tbody> </table> |  | 2-drug regimen | 3-drug regimen | Weight (kg) | +2.1 | 0.6 |
|                                                   | 2-drug regimen | 3-drug regimen              |                                                                                                                                                                                                                                                                                                                                                                                                                                                               |                                                          |                                                                |                                                      |             |       |       |              |       |       |              |       |       |               |       |       |              |       |       |                                                                                                                                                                                                                                                                                                                                                                                                                                                                                                                                                                                                                                                                                           |  |                |                |             |          |       |                                        |          |         |                                                |         |       |                                 |          |         |                                                   |          |       |                                      |          |        |                                                                                                                                                                                                                                                                                                                                                                                                                                                                                        |  |                |                |                                     |       |       |                         |       |       |                                                 |       |       |                                 |       |       |                                                                                                                                                                                                                                                                      |  |                |                |             |      |     |
| TC (mmol/L)                                       | + 0.6          | + 1.6                       |                                                                                                                                                                                                                                                                                                                                                                                                                                                               |                                                          |                                                                |                                                      |             |       |       |              |       |       |              |       |       |               |       |       |              |       |       |                                                                                                                                                                                                                                                                                                                                                                                                                                                                                                                                                                                                                                                                                           |  |                |                |             |          |       |                                        |          |         |                                                |         |       |                                 |          |         |                                                   |          |       |                                      |          |        |                                                                                                                                                                                                                                                                                                                                                                                                                                                                                        |  |                |                |                                     |       |       |                         |       |       |                                                 |       |       |                                 |       |       |                                                                                                                                                                                                                                                                      |  |                |                |             |      |     |
| HDL (mmol/L)                                      | - 1.0          | + 1.6                       |                                                                                                                                                                                                                                                                                                                                                                                                                                                               |                                                          |                                                                |                                                      |             |       |       |              |       |       |              |       |       |               |       |       |              |       |       |                                                                                                                                                                                                                                                                                                                                                                                                                                                                                                                                                                                                                                                                                           |  |                |                |             |          |       |                                        |          |         |                                                |         |       |                                 |          |         |                                                   |          |       |                                      |          |        |                                                                                                                                                                                                                                                                                                                                                                                                                                                                                        |  |                |                |                                     |       |       |                         |       |       |                                                 |       |       |                                 |       |       |                                                                                                                                                                                                                                                                      |  |                |                |             |      |     |
| LDL (mmol/L)                                      | + 2.5          | + 2.5                       |                                                                                                                                                                                                                                                                                                                                                                                                                                                               |                                                          |                                                                |                                                      |             |       |       |              |       |       |              |       |       |               |       |       |              |       |       |                                                                                                                                                                                                                                                                                                                                                                                                                                                                                                                                                                                                                                                                                           |  |                |                |             |          |       |                                        |          |         |                                                |         |       |                                 |          |         |                                                   |          |       |                                      |          |        |                                                                                                                                                                                                                                                                                                                                                                                                                                                                                        |  |                |                |                                     |       |       |                         |       |       |                                                 |       |       |                                 |       |       |                                                                                                                                                                                                                                                                      |  |                |                |             |      |     |
| TRIG (mmol/L)                                     | - 3.2          | - 3.2                       |                                                                                                                                                                                                                                                                                                                                                                                                                                                               |                                                          |                                                                |                                                      |             |       |       |              |       |       |              |       |       |               |       |       |              |       |       |                                                                                                                                                                                                                                                                                                                                                                                                                                                                                                                                                                                                                                                                                           |  |                |                |             |          |       |                                        |          |         |                                                |         |       |                                 |          |         |                                                   |          |       |                                      |          |        |                                                                                                                                                                                                                                                                                                                                                                                                                                                                                        |  |                |                |                                     |       |       |                         |       |       |                                                 |       |       |                                 |       |       |                                                                                                                                                                                                                                                                      |  |                |                |             |      |     |
| TC/HDL ratio                                      | + 1.8          | + 0.2                       |                                                                                                                                                                                                                                                                                                                                                                                                                                                               |                                                          |                                                                |                                                      |             |       |       |              |       |       |              |       |       |               |       |       |              |       |       |                                                                                                                                                                                                                                                                                                                                                                                                                                                                                                                                                                                                                                                                                           |  |                |                |             |          |       |                                        |          |         |                                                |         |       |                                 |          |         |                                                   |          |       |                                      |          |        |                                                                                                                                                                                                                                                                                                                                                                                                                                                                                        |  |                |                |                                     |       |       |                         |       |       |                                                 |       |       |                                 |       |       |                                                                                                                                                                                                                                                                      |  |                |                |             |      |     |
|                                                   | 2-drug regimen | 3-drug regimen              |                                                                                                                                                                                                                                                                                                                                                                                                                                                               |                                                          |                                                                |                                                      |             |       |       |              |       |       |              |       |       |               |       |       |              |       |       |                                                                                                                                                                                                                                                                                                                                                                                                                                                                                                                                                                                                                                                                                           |  |                |                |             |          |       |                                        |          |         |                                                |         |       |                                 |          |         |                                                   |          |       |                                      |          |        |                                                                                                                                                                                                                                                                                                                                                                                                                                                                                        |  |                |                |                                     |       |       |                         |       |       |                                                 |       |       |                                 |       |       |                                                                                                                                                                                                                                                                      |  |                |                |             |      |     |
| Cr (µmol/L)                                       | + 11.6 *       | + 5.2                       |                                                                                                                                                                                                                                                                                                                                                                                                                                                               |                                                          |                                                                |                                                      |             |       |       |              |       |       |              |       |       |               |       |       |              |       |       |                                                                                                                                                                                                                                                                                                                                                                                                                                                                                                                                                                                                                                                                                           |  |                |                |             |          |       |                                        |          |         |                                                |         |       |                                 |          |         |                                                   |          |       |                                      |          |        |                                                                                                                                                                                                                                                                                                                                                                                                                                                                                        |  |                |                |                                     |       |       |                         |       |       |                                                 |       |       |                                 |       |       |                                                                                                                                                                                                                                                                      |  |                |                |             |      |     |
| eGFR, Cr (mL/min/1.73 m <sup>2</sup> )            | - 12.6 *       | - 6.1 *                     |                                                                                                                                                                                                                                                                                                                                                                                                                                                               |                                                          |                                                                |                                                      |             |       |       |              |       |       |              |       |       |               |       |       |              |       |       |                                                                                                                                                                                                                                                                                                                                                                                                                                                                                                                                                                                                                                                                                           |  |                |                |             |          |       |                                        |          |         |                                                |         |       |                                 |          |         |                                                   |          |       |                                      |          |        |                                                                                                                                                                                                                                                                                                                                                                                                                                                                                        |  |                |                |                                     |       |       |                         |       |       |                                                 |       |       |                                 |       |       |                                                                                                                                                                                                                                                                      |  |                |                |             |      |     |
| eGFR, cystatin C (mL/min/1.73 m <sup>2</sup> )    | - 1.5 *        | - 0.9                       |                                                                                                                                                                                                                                                                                                                                                                                                                                                               |                                                          |                                                                |                                                      |             |       |       |              |       |       |              |       |       |               |       |       |              |       |       |                                                                                                                                                                                                                                                                                                                                                                                                                                                                                                                                                                                                                                                                                           |  |                |                |             |          |       |                                        |          |         |                                                |         |       |                                 |          |         |                                                   |          |       |                                      |          |        |                                                                                                                                                                                                                                                                                                                                                                                                                                                                                        |  |                |                |                                     |       |       |                         |       |       |                                                 |       |       |                                 |       |       |                                                                                                                                                                                                                                                                      |  |                |                |             |      |     |
| Urine protein/Cr ratio (g/mol)*                   | - 27.3 *       | - 9.6 *                     |                                                                                                                                                                                                                                                                                                                                                                                                                                                               |                                                          |                                                                |                                                      |             |       |       |              |       |       |              |       |       |               |       |       |              |       |       |                                                                                                                                                                                                                                                                                                                                                                                                                                                                                                                                                                                                                                                                                           |  |                |                |             |          |       |                                        |          |         |                                                |         |       |                                 |          |         |                                                   |          |       |                                      |          |        |                                                                                                                                                                                                                                                                                                                                                                                                                                                                                        |  |                |                |                                     |       |       |                         |       |       |                                                 |       |       |                                 |       |       |                                                                                                                                                                                                                                                                      |  |                |                |             |      |     |
| Urine retinol binding protein/Cr ratio (mg/mmol)* | - 23.0 *       | + 3.6                       |                                                                                                                                                                                                                                                                                                                                                                                                                                                               |                                                          |                                                                |                                                      |             |       |       |              |       |       |              |       |       |               |       |       |              |       |       |                                                                                                                                                                                                                                                                                                                                                                                                                                                                                                                                                                                                                                                                                           |  |                |                |             |          |       |                                        |          |         |                                                |         |       |                                 |          |         |                                                   |          |       |                                      |          |        |                                                                                                                                                                                                                                                                                                                                                                                                                                                                                        |  |                |                |                                     |       |       |                         |       |       |                                                 |       |       |                                 |       |       |                                                                                                                                                                                                                                                                      |  |                |                |             |      |     |
| B2 microglobulin/Cr ratio (mg/mmol)*              | - 32.6 *       | - 11.1                      |                                                                                                                                                                                                                                                                                                                                                                                                                                                               |                                                          |                                                                |                                                      |             |       |       |              |       |       |              |       |       |               |       |       |              |       |       |                                                                                                                                                                                                                                                                                                                                                                                                                                                                                                                                                                                                                                                                                           |  |                |                |             |          |       |                                        |          |         |                                                |         |       |                                 |          |         |                                                   |          |       |                                      |          |        |                                                                                                                                                                                                                                                                                                                                                                                                                                                                                        |  |                |                |                                     |       |       |                         |       |       |                                                 |       |       |                                 |       |       |                                                                                                                                                                                                                                                                      |  |                |                |             |      |     |
|                                                   | 2-drug regimen | 3-drug regimen              |                                                                                                                                                                                                                                                                                                                                                                                                                                                               |                                                          |                                                                |                                                      |             |       |       |              |       |       |              |       |       |               |       |       |              |       |       |                                                                                                                                                                                                                                                                                                                                                                                                                                                                                                                                                                                                                                                                                           |  |                |                |             |          |       |                                        |          |         |                                                |         |       |                                 |          |         |                                                   |          |       |                                      |          |        |                                                                                                                                                                                                                                                                                                                                                                                                                                                                                        |  |                |                |                                     |       |       |                         |       |       |                                                 |       |       |                                 |       |       |                                                                                                                                                                                                                                                                      |  |                |                |             |      |     |
| Bone-specific alkaline phosphatase*               | -2.86          | -0.24                       |                                                                                                                                                                                                                                                                                                                                                                                                                                                               |                                                          |                                                                |                                                      |             |       |       |              |       |       |              |       |       |               |       |       |              |       |       |                                                                                                                                                                                                                                                                                                                                                                                                                                                                                                                                                                                                                                                                                           |  |                |                |             |          |       |                                        |          |         |                                                |         |       |                                 |          |         |                                                   |          |       |                                      |          |        |                                                                                                                                                                                                                                                                                                                                                                                                                                                                                        |  |                |                |                                     |       |       |                         |       |       |                                                 |       |       |                                 |       |       |                                                                                                                                                                                                                                                                      |  |                |                |             |      |     |
| Serum osteocalcin (µL)*                           | -0.94          | +1.77                       |                                                                                                                                                                                                                                                                                                                                                                                                                                                               |                                                          |                                                                |                                                      |             |       |       |              |       |       |              |       |       |               |       |       |              |       |       |                                                                                                                                                                                                                                                                                                                                                                                                                                                                                                                                                                                                                                                                                           |  |                |                |             |          |       |                                        |          |         |                                                |         |       |                                 |          |         |                                                   |          |       |                                      |          |        |                                                                                                                                                                                                                                                                                                                                                                                                                                                                                        |  |                |                |                                     |       |       |                         |       |       |                                                 |       |       |                                 |       |       |                                                                                                                                                                                                                                                                      |  |                |                |             |      |     |
| Serum procollagen-1-N-terminal propeptide (µL)*   | -6.47          | -0.69                       |                                                                                                                                                                                                                                                                                                                                                                                                                                                               |                                                          |                                                                |                                                      |             |       |       |              |       |       |              |       |       |               |       |       |              |       |       |                                                                                                                                                                                                                                                                                                                                                                                                                                                                                                                                                                                                                                                                                           |  |                |                |             |          |       |                                        |          |         |                                                |         |       |                                 |          |         |                                                   |          |       |                                      |          |        |                                                                                                                                                                                                                                                                                                                                                                                                                                                                                        |  |                |                |                                     |       |       |                         |       |       |                                                 |       |       |                                 |       |       |                                                                                                                                                                                                                                                                      |  |                |                |             |      |     |
| Type 1 collagen C-peptide (µL)*                   | -0.04          | +0.03                       |                                                                                                                                                                                                                                                                                                                                                                                                                                                               |                                                          |                                                                |                                                      |             |       |       |              |       |       |              |       |       |               |       |       |              |       |       |                                                                                                                                                                                                                                                                                                                                                                                                                                                                                                                                                                                                                                                                                           |  |                |                |             |          |       |                                        |          |         |                                                |         |       |                                 |          |         |                                                   |          |       |                                      |          |        |                                                                                                                                                                                                                                                                                                                                                                                                                                                                                        |  |                |                |                                     |       |       |                         |       |       |                                                 |       |       |                                 |       |       |                                                                                                                                                                                                                                                                      |  |                |                |             |      |     |
|                                                   | 2-drug regimen | 3-drug regimen              |                                                                                                                                                                                                                                                                                                                                                                                                                                                               |                                                          |                                                                |                                                      |             |       |       |              |       |       |              |       |       |               |       |       |              |       |       |                                                                                                                                                                                                                                                                                                                                                                                                                                                                                                                                                                                                                                                                                           |  |                |                |             |          |       |                                        |          |         |                                                |         |       |                                 |          |         |                                                   |          |       |                                      |          |        |                                                                                                                                                                                                                                                                                                                                                                                                                                                                                        |  |                |                |                                     |       |       |                         |       |       |                                                 |       |       |                                 |       |       |                                                                                                                                                                                                                                                                      |  |                |                |             |      |     |
| Weight (kg)                                       | +2.1           | 0.6                         |                                                                                                                                                                                                                                                                                                                                                                                                                                                               |                                                          |                                                                |                                                      |             |       |       |              |       |       |              |       |       |               |       |       |              |       |       |                                                                                                                                                                                                                                                                                                                                                                                                                                                                                                                                                                                                                                                                                           |  |                |                |             |          |       |                                        |          |         |                                                |         |       |                                 |          |         |                                                   |          |       |                                      |          |        |                                                                                                                                                                                                                                                                                                                                                                                                                                                                                        |  |                |                |                                     |       |       |                         |       |       |                                                 |       |       |                                 |       |       |                                                                                                                                                                                                                                                                      |  |                |                |             |      |     |
| BMI (kg/m <sup>2</sup> )                          | + 0.7          | 0.2                         |                                                                                                                                                                                                                                                                                                                                                                                                                                                               |                                                          |                                                                |                                                      |             |       |       |              |       |       |              |       |       |               |       |       |              |       |       |                                                                                                                                                                                                                                                                                                                                                                                                                                                                                                                                                                                                                                                                                           |  |                |                |             |          |       |                                        |          |         |                                                |         |       |                                 |          |         |                                                   |          |       |                                      |          |        |                                                                                                                                                                                                                                                                                                                                                                                                                                                                                        |  |                |                |                                     |       |       |                         |       |       |                                                 |       |       |                                 |       |       |                                                                                                                                                                                                                                                                      |  |                |                |             |      |     |
|                                                   |                |                             |                                                                                                                                                                                                                                                                                                                                                                                                                                                               |                                                          |                                                                | +Significance level not reported                     |             |       |       |              |       |       |              |       |       |               |       |       |              |       |       |                                                                                                                                                                                                                                                                                                                                                                                                                                                                                                                                                                                                                                                                                           |  |                |                |             |          |       |                                        |          |         |                                                |         |       |                                 |          |         |                                                   |          |       |                                      |          |        |                                                                                                                                                                                                                                                                                                                                                                                                                                                                                        |  |                |                |                                     |       |       |                         |       |       |                                                 |       |       |                                 |       |       |                                                                                                                                                                                                                                                                      |  |                |                |             |      |     |

DTG + NRTI

| SWORD 1 & 2 <sup>24-26, 79,80</sup>                                           | DTG + RPV      | Current/ standard ART Therapy (cART)<br><br>At 52 weeks, these participants were switched to DTG + RPV (late switch group) | Mean change in lipids from baseline (week 48):                                                                                                                                                                                                                                                                                                                                                                                                                 | Mean change in renal biomarkers from baseline (week 48) <sup>1</sup> : | Mean change in bone turn-over markers from baseline (week 48): |                |            |        |        |             |        |        |             |        |        |              |        |        |              |        |        |                                                                                                                                                                                                                                                                                                                                                                                                                                                                                                                                                                                                                         |  |                |                |                                                                               |       |       |                                                                           |      |      |                                                                           |       |       |                                                                  |        |        |                                                                                                                                                                                                                                                                                                                                                                                                                                                                                                    |        |              |                                                                                                                                                                                                                                                                                                                                                                                                                                                                                                              |                                                 |                |                |                                                  |       |       |                                                    |       |       |                                                    |       |       |                                   |        |        |
|-------------------------------------------------------------------------------|----------------|----------------------------------------------------------------------------------------------------------------------------|----------------------------------------------------------------------------------------------------------------------------------------------------------------------------------------------------------------------------------------------------------------------------------------------------------------------------------------------------------------------------------------------------------------------------------------------------------------|------------------------------------------------------------------------|----------------------------------------------------------------|----------------|------------|--------|--------|-------------|--------|--------|-------------|--------|--------|--------------|--------|--------|--------------|--------|--------|-------------------------------------------------------------------------------------------------------------------------------------------------------------------------------------------------------------------------------------------------------------------------------------------------------------------------------------------------------------------------------------------------------------------------------------------------------------------------------------------------------------------------------------------------------------------------------------------------------------------------|--|----------------|----------------|-------------------------------------------------------------------------------|-------|-------|---------------------------------------------------------------------------|------|------|---------------------------------------------------------------------------|-------|-------|------------------------------------------------------------------|--------|--------|----------------------------------------------------------------------------------------------------------------------------------------------------------------------------------------------------------------------------------------------------------------------------------------------------------------------------------------------------------------------------------------------------------------------------------------------------------------------------------------------------|--------|--------------|--------------------------------------------------------------------------------------------------------------------------------------------------------------------------------------------------------------------------------------------------------------------------------------------------------------------------------------------------------------------------------------------------------------------------------------------------------------------------------------------------------------|-------------------------------------------------|----------------|----------------|--------------------------------------------------|-------|-------|----------------------------------------------------|-------|-------|----------------------------------------------------|-------|-------|-----------------------------------|--------|--------|
|                                                                               |                |                                                                                                                            | <table border="1"> <thead> <tr> <th></th> <th>2-drug regimen</th> <th>3-drug regimen</th> </tr> </thead> <tbody> <tr> <td>TC (mg/dL)</td> <td>+ 2.1</td> <td>- 0.3</td> </tr> <tr> <td>HDL (mg/dL)</td> <td>+ 1.8</td> <td>+ 2.4</td> </tr> <tr> <td>LDL (mg/dL)</td> <td>+ 1.8</td> <td>- 1.3</td> </tr> <tr> <td>TRIG (mg/dL)</td> <td>- 8.4</td> <td>- 0.5</td> </tr> <tr> <td>TC/HDL ratio</td> <td>- 0.11</td> <td>- 0.08</td> </tr> </tbody> </table>    |                                                                        | 2-drug regimen                                                 | 3-drug regimen | TC (mg/dL) | + 2.1  | - 0.3  | HDL (mg/dL) | + 1.8  | + 2.4  | LDL (mg/dL) | + 1.8  | - 1.3  | TRIG (mg/dL) | - 8.4  | - 0.5  | TC/HDL ratio | - 0.11 | - 0.08 | <table border="1"> <thead> <tr> <th></th> <th>2-drug regimen</th> <th>3-drug regimen</th> </tr> </thead> <tbody> <tr> <td>Cystatin C (mg/L)</td> <td>0.00</td> <td>0.00</td> </tr> <tr> <td>GFR from cystatin C (mL/min/1.73 m<sup>2</sup>) w/prior TDF exposure **</td> <td>0.00</td> <td>0.00</td> </tr> <tr> <td>GFR from cystatin C (mL/min/1.73 m<sup>2</sup>) w/no prior TDF exposure</td> <td>0.00</td> <td>0.00</td> </tr> <tr> <td>Retinol binding protein (nmol/L)</td> <td>- 1.87</td> <td>- 0.76</td> </tr> <tr> <td>B2 microglobulin (nmol/L)</td> <td>- 3.39</td> <td>- 0.00</td> </tr> </tbody> </table> |  | 2-drug regimen | 3-drug regimen | Cystatin C (mg/L)                                                             | 0.00  | 0.00  | GFR from cystatin C (mL/min/1.73 m <sup>2</sup> ) w/prior TDF exposure ** | 0.00 | 0.00 | GFR from cystatin C (mL/min/1.73 m <sup>2</sup> ) w/no prior TDF exposure | 0.00  | 0.00  | Retinol binding protein (nmol/L)                                 | - 1.87 | - 0.76 | B2 microglobulin (nmol/L)                                                                                                                                                                                                                                                                                                                                                                                                                                                                          | - 3.39 | - 0.00       | <table border="1"> <thead> <tr> <th></th> <th>2-drug regimen</th> <th>3-drug regimen</th> </tr> </thead> <tbody> <tr> <td>Serum bone-specific alkaline phosphatase (µL) **</td> <td>- 3.0</td> <td>- 0.9</td> </tr> <tr> <td>Serum osteocalcin (µL) **</td> <td>- 4.8</td> <td>- 0.9</td> </tr> <tr> <td>Serum procollagen-1 N-terminal pro-peptide (µL) **</td> <td>- 7.4</td> <td>- 1.0</td> </tr> <tr> <td>Type I collagen C-peptide (µL) **</td> <td>- 0.17</td> <td>- 0.06</td> </tr> </tbody> </table> |                                                 | 2-drug regimen | 3-drug regimen | Serum bone-specific alkaline phosphatase (µL) ** | - 3.0 | - 0.9 | Serum osteocalcin (µL) **                          | - 4.8 | - 0.9 | Serum procollagen-1 N-terminal pro-peptide (µL) ** | - 7.4 | - 1.0 | Type I collagen C-peptide (µL) ** | - 0.17 | - 0.06 |
|                                                                               | 2-drug regimen | 3-drug regimen                                                                                                             |                                                                                                                                                                                                                                                                                                                                                                                                                                                                |                                                                        |                                                                |                |            |        |        |             |        |        |             |        |        |              |        |        |              |        |        |                                                                                                                                                                                                                                                                                                                                                                                                                                                                                                                                                                                                                         |  |                |                |                                                                               |       |       |                                                                           |      |      |                                                                           |       |       |                                                                  |        |        |                                                                                                                                                                                                                                                                                                                                                                                                                                                                                                    |        |              |                                                                                                                                                                                                                                                                                                                                                                                                                                                                                                              |                                                 |                |                |                                                  |       |       |                                                    |       |       |                                                    |       |       |                                   |        |        |
| TC (mg/dL)                                                                    | + 2.1          | - 0.3                                                                                                                      |                                                                                                                                                                                                                                                                                                                                                                                                                                                                |                                                                        |                                                                |                |            |        |        |             |        |        |             |        |        |              |        |        |              |        |        |                                                                                                                                                                                                                                                                                                                                                                                                                                                                                                                                                                                                                         |  |                |                |                                                                               |       |       |                                                                           |      |      |                                                                           |       |       |                                                                  |        |        |                                                                                                                                                                                                                                                                                                                                                                                                                                                                                                    |        |              |                                                                                                                                                                                                                                                                                                                                                                                                                                                                                                              |                                                 |                |                |                                                  |       |       |                                                    |       |       |                                                    |       |       |                                   |        |        |
| HDL (mg/dL)                                                                   | + 1.8          | + 2.4                                                                                                                      |                                                                                                                                                                                                                                                                                                                                                                                                                                                                |                                                                        |                                                                |                |            |        |        |             |        |        |             |        |        |              |        |        |              |        |        |                                                                                                                                                                                                                                                                                                                                                                                                                                                                                                                                                                                                                         |  |                |                |                                                                               |       |       |                                                                           |      |      |                                                                           |       |       |                                                                  |        |        |                                                                                                                                                                                                                                                                                                                                                                                                                                                                                                    |        |              |                                                                                                                                                                                                                                                                                                                                                                                                                                                                                                              |                                                 |                |                |                                                  |       |       |                                                    |       |       |                                                    |       |       |                                   |        |        |
| LDL (mg/dL)                                                                   | + 1.8          | - 1.3                                                                                                                      |                                                                                                                                                                                                                                                                                                                                                                                                                                                                |                                                                        |                                                                |                |            |        |        |             |        |        |             |        |        |              |        |        |              |        |        |                                                                                                                                                                                                                                                                                                                                                                                                                                                                                                                                                                                                                         |  |                |                |                                                                               |       |       |                                                                           |      |      |                                                                           |       |       |                                                                  |        |        |                                                                                                                                                                                                                                                                                                                                                                                                                                                                                                    |        |              |                                                                                                                                                                                                                                                                                                                                                                                                                                                                                                              |                                                 |                |                |                                                  |       |       |                                                    |       |       |                                                    |       |       |                                   |        |        |
| TRIG (mg/dL)                                                                  | - 8.4          | - 0.5                                                                                                                      |                                                                                                                                                                                                                                                                                                                                                                                                                                                                |                                                                        |                                                                |                |            |        |        |             |        |        |             |        |        |              |        |        |              |        |        |                                                                                                                                                                                                                                                                                                                                                                                                                                                                                                                                                                                                                         |  |                |                |                                                                               |       |       |                                                                           |      |      |                                                                           |       |       |                                                                  |        |        |                                                                                                                                                                                                                                                                                                                                                                                                                                                                                                    |        |              |                                                                                                                                                                                                                                                                                                                                                                                                                                                                                                              |                                                 |                |                |                                                  |       |       |                                                    |       |       |                                                    |       |       |                                   |        |        |
| TC/HDL ratio                                                                  | - 0.11         | - 0.08                                                                                                                     |                                                                                                                                                                                                                                                                                                                                                                                                                                                                |                                                                        |                                                                |                |            |        |        |             |        |        |             |        |        |              |        |        |              |        |        |                                                                                                                                                                                                                                                                                                                                                                                                                                                                                                                                                                                                                         |  |                |                |                                                                               |       |       |                                                                           |      |      |                                                                           |       |       |                                                                  |        |        |                                                                                                                                                                                                                                                                                                                                                                                                                                                                                                    |        |              |                                                                                                                                                                                                                                                                                                                                                                                                                                                                                                              |                                                 |                |                |                                                  |       |       |                                                    |       |       |                                                    |       |       |                                   |        |        |
|                                                                               | 2-drug regimen | 3-drug regimen                                                                                                             |                                                                                                                                                                                                                                                                                                                                                                                                                                                                |                                                                        |                                                                |                |            |        |        |             |        |        |             |        |        |              |        |        |              |        |        |                                                                                                                                                                                                                                                                                                                                                                                                                                                                                                                                                                                                                         |  |                |                |                                                                               |       |       |                                                                           |      |      |                                                                           |       |       |                                                                  |        |        |                                                                                                                                                                                                                                                                                                                                                                                                                                                                                                    |        |              |                                                                                                                                                                                                                                                                                                                                                                                                                                                                                                              |                                                 |                |                |                                                  |       |       |                                                    |       |       |                                                    |       |       |                                   |        |        |
| Cystatin C (mg/L)                                                             | 0.00           | 0.00                                                                                                                       |                                                                                                                                                                                                                                                                                                                                                                                                                                                                |                                                                        |                                                                |                |            |        |        |             |        |        |             |        |        |              |        |        |              |        |        |                                                                                                                                                                                                                                                                                                                                                                                                                                                                                                                                                                                                                         |  |                |                |                                                                               |       |       |                                                                           |      |      |                                                                           |       |       |                                                                  |        |        |                                                                                                                                                                                                                                                                                                                                                                                                                                                                                                    |        |              |                                                                                                                                                                                                                                                                                                                                                                                                                                                                                                              |                                                 |                |                |                                                  |       |       |                                                    |       |       |                                                    |       |       |                                   |        |        |
| GFR from cystatin C (mL/min/1.73 m <sup>2</sup> ) w/prior TDF exposure **     | 0.00           | 0.00                                                                                                                       |                                                                                                                                                                                                                                                                                                                                                                                                                                                                |                                                                        |                                                                |                |            |        |        |             |        |        |             |        |        |              |        |        |              |        |        |                                                                                                                                                                                                                                                                                                                                                                                                                                                                                                                                                                                                                         |  |                |                |                                                                               |       |       |                                                                           |      |      |                                                                           |       |       |                                                                  |        |        |                                                                                                                                                                                                                                                                                                                                                                                                                                                                                                    |        |              |                                                                                                                                                                                                                                                                                                                                                                                                                                                                                                              |                                                 |                |                |                                                  |       |       |                                                    |       |       |                                                    |       |       |                                   |        |        |
| GFR from cystatin C (mL/min/1.73 m <sup>2</sup> ) w/no prior TDF exposure     | 0.00           | 0.00                                                                                                                       |                                                                                                                                                                                                                                                                                                                                                                                                                                                                |                                                                        |                                                                |                |            |        |        |             |        |        |             |        |        |              |        |        |              |        |        |                                                                                                                                                                                                                                                                                                                                                                                                                                                                                                                                                                                                                         |  |                |                |                                                                               |       |       |                                                                           |      |      |                                                                           |       |       |                                                                  |        |        |                                                                                                                                                                                                                                                                                                                                                                                                                                                                                                    |        |              |                                                                                                                                                                                                                                                                                                                                                                                                                                                                                                              |                                                 |                |                |                                                  |       |       |                                                    |       |       |                                                    |       |       |                                   |        |        |
| Retinol binding protein (nmol/L)                                              | - 1.87         | - 0.76                                                                                                                     |                                                                                                                                                                                                                                                                                                                                                                                                                                                                |                                                                        |                                                                |                |            |        |        |             |        |        |             |        |        |              |        |        |              |        |        |                                                                                                                                                                                                                                                                                                                                                                                                                                                                                                                                                                                                                         |  |                |                |                                                                               |       |       |                                                                           |      |      |                                                                           |       |       |                                                                  |        |        |                                                                                                                                                                                                                                                                                                                                                                                                                                                                                                    |        |              |                                                                                                                                                                                                                                                                                                                                                                                                                                                                                                              |                                                 |                |                |                                                  |       |       |                                                    |       |       |                                                    |       |       |                                   |        |        |
| B2 microglobulin (nmol/L)                                                     | - 3.39         | - 0.00                                                                                                                     |                                                                                                                                                                                                                                                                                                                                                                                                                                                                |                                                                        |                                                                |                |            |        |        |             |        |        |             |        |        |              |        |        |              |        |        |                                                                                                                                                                                                                                                                                                                                                                                                                                                                                                                                                                                                                         |  |                |                |                                                                               |       |       |                                                                           |      |      |                                                                           |       |       |                                                                  |        |        |                                                                                                                                                                                                                                                                                                                                                                                                                                                                                                    |        |              |                                                                                                                                                                                                                                                                                                                                                                                                                                                                                                              |                                                 |                |                |                                                  |       |       |                                                    |       |       |                                                    |       |       |                                   |        |        |
|                                                                               | 2-drug regimen | 3-drug regimen                                                                                                             |                                                                                                                                                                                                                                                                                                                                                                                                                                                                |                                                                        |                                                                |                |            |        |        |             |        |        |             |        |        |              |        |        |              |        |        |                                                                                                                                                                                                                                                                                                                                                                                                                                                                                                                                                                                                                         |  |                |                |                                                                               |       |       |                                                                           |      |      |                                                                           |       |       |                                                                  |        |        |                                                                                                                                                                                                                                                                                                                                                                                                                                                                                                    |        |              |                                                                                                                                                                                                                                                                                                                                                                                                                                                                                                              |                                                 |                |                |                                                  |       |       |                                                    |       |       |                                                    |       |       |                                   |        |        |
| Serum bone-specific alkaline phosphatase (µL) **                              | - 3.0          | - 0.9                                                                                                                      |                                                                                                                                                                                                                                                                                                                                                                                                                                                                |                                                                        |                                                                |                |            |        |        |             |        |        |             |        |        |              |        |        |              |        |        |                                                                                                                                                                                                                                                                                                                                                                                                                                                                                                                                                                                                                         |  |                |                |                                                                               |       |       |                                                                           |      |      |                                                                           |       |       |                                                                  |        |        |                                                                                                                                                                                                                                                                                                                                                                                                                                                                                                    |        |              |                                                                                                                                                                                                                                                                                                                                                                                                                                                                                                              |                                                 |                |                |                                                  |       |       |                                                    |       |       |                                                    |       |       |                                   |        |        |
| Serum osteocalcin (µL) **                                                     | - 4.8          | - 0.9                                                                                                                      |                                                                                                                                                                                                                                                                                                                                                                                                                                                                |                                                                        |                                                                |                |            |        |        |             |        |        |             |        |        |              |        |        |              |        |        |                                                                                                                                                                                                                                                                                                                                                                                                                                                                                                                                                                                                                         |  |                |                |                                                                               |       |       |                                                                           |      |      |                                                                           |       |       |                                                                  |        |        |                                                                                                                                                                                                                                                                                                                                                                                                                                                                                                    |        |              |                                                                                                                                                                                                                                                                                                                                                                                                                                                                                                              |                                                 |                |                |                                                  |       |       |                                                    |       |       |                                                    |       |       |                                   |        |        |
| Serum procollagen-1 N-terminal pro-peptide (µL) **                            | - 7.4          | - 1.0                                                                                                                      |                                                                                                                                                                                                                                                                                                                                                                                                                                                                |                                                                        |                                                                |                |            |        |        |             |        |        |             |        |        |              |        |        |              |        |        |                                                                                                                                                                                                                                                                                                                                                                                                                                                                                                                                                                                                                         |  |                |                |                                                                               |       |       |                                                                           |      |      |                                                                           |       |       |                                                                  |        |        |                                                                                                                                                                                                                                                                                                                                                                                                                                                                                                    |        |              |                                                                                                                                                                                                                                                                                                                                                                                                                                                                                                              |                                                 |                |                |                                                  |       |       |                                                    |       |       |                                                    |       |       |                                   |        |        |
| Type I collagen C-peptide (µL) **                                             | - 0.17         | - 0.06                                                                                                                     |                                                                                                                                                                                                                                                                                                                                                                                                                                                                |                                                                        |                                                                |                |            |        |        |             |        |        |             |        |        |              |        |        |              |        |        |                                                                                                                                                                                                                                                                                                                                                                                                                                                                                                                                                                                                                         |  |                |                |                                                                               |       |       |                                                                           |      |      |                                                                           |       |       |                                                                  |        |        |                                                                                                                                                                                                                                                                                                                                                                                                                                                                                                    |        |              |                                                                                                                                                                                                                                                                                                                                                                                                                                                                                                              |                                                 |                |                |                                                  |       |       |                                                    |       |       |                                                    |       |       |                                   |        |        |
|                                                                               |                |                                                                                                                            | Mean change in lipids from baseline (week 148):                                                                                                                                                                                                                                                                                                                                                                                                                | Mean change in renal biomarkers from baseline (week 148):              | Mean change in bone turn-over markers from baseline (week 48): |                |            |        |        |             |        |        |             |        |        |              |        |        |              |        |        |                                                                                                                                                                                                                                                                                                                                                                                                                                                                                                                                                                                                                         |  |                |                |                                                                               |       |       |                                                                           |      |      |                                                                           |       |       |                                                                  |        |        |                                                                                                                                                                                                                                                                                                                                                                                                                                                                                                    |        |              |                                                                                                                                                                                                                                                                                                                                                                                                                                                                                                              |                                                 |                |                |                                                  |       |       |                                                    |       |       |                                                    |       |       |                                   |        |        |
|                                                                               |                |                                                                                                                            | <table border="1"> <thead> <tr> <th></th> <th>Early switch</th> <th>Late switch</th> </tr> </thead> <tbody> <tr> <td>TC (mg/dL)</td> <td>+ 0.13</td> <td>+ 0.08</td> </tr> <tr> <td>HDL (mg/dL)</td> <td>+ 0.05</td> <td>+ 0.01</td> </tr> <tr> <td>LDL (mg/dL)</td> <td>+ 0.11</td> <td>+ 0.12</td> </tr> <tr> <td>TRIG (mg/dL)</td> <td>- 0.02</td> <td>- 0.12</td> </tr> <tr> <td>TC/HDL ratio</td> <td>- 0.04</td> <td>+ 0.03</td> </tr> </tbody> </table> |                                                                        | Early switch                                                   | Late switch    | TC (mg/dL) | + 0.13 | + 0.08 | HDL (mg/dL) | + 0.05 | + 0.01 | LDL (mg/dL) | + 0.11 | + 0.12 | TRIG (mg/dL) | - 0.02 | - 0.12 | TC/HDL ratio | - 0.04 | + 0.03 | <table border="1"> <thead> <tr> <th></th> <th>Early switch</th> <th>Late switch</th> </tr> </thead> <tbody> <tr> <td>% change in urine retinol-binding protein/creatinine ratio (+ TDF pre-switch)</td> <td>-28.8</td> <td>-22.3</td> </tr> <tr> <td>% change in urine β2 microglobulin/Cr ratio, (no TDF pre-switch)</td> <td>-2.3</td> <td>+0.4</td> </tr> <tr> <td>% change in urine β2 microglobulin/Cr ratio, (+ TDF pre-switch)</td> <td>-34.8</td> <td>-41.5</td> </tr> <tr> <td>% change in urine β2 microglobulin/Cr ratio, (no TDF pre-switch)</td> <td>-28.9</td> <td>+1.6</td> </tr> </tbody> </table>      |  | Early switch   | Late switch    | % change in urine retinol-binding protein/creatinine ratio (+ TDF pre-switch) | -28.8 | -22.3 | % change in urine β2 microglobulin/Cr ratio, (no TDF pre-switch)          | -2.3 | +0.4 | % change in urine β2 microglobulin/Cr ratio, (+ TDF pre-switch)           | -34.8 | -41.5 | % change in urine β2 microglobulin/Cr ratio, (no TDF pre-switch) | -28.9  | +1.6   | <table border="1"> <thead> <tr> <th></th> <th>Early switch</th> <th>Late switch</th> </tr> </thead> <tbody> <tr> <td>Serum bone-specific alkaline phosphatase (µL)**</td> <td>- 3.4</td> <td>- 3.5</td> </tr> <tr> <td>Serum osteocalcin (µL)**</td> <td>- 4.9</td> <td>- 4.8</td> </tr> <tr> <td>Serum procollagen-1 N-terminal pro-peptide (µL) **</td> <td>- 4.2</td> <td>- 7.3</td> </tr> <tr> <td>Type I collagen C-peptide (µL) *</td> <td>- 0.1</td> <td>- 0.1</td> </tr> </tbody> </table> |        | Early switch | Late switch                                                                                                                                                                                                                                                                                                                                                                                                                                                                                                  | Serum bone-specific alkaline phosphatase (µL)** | - 3.4          | - 3.5          | Serum osteocalcin (µL)**                         | - 4.9 | - 4.8 | Serum procollagen-1 N-terminal pro-peptide (µL) ** | - 4.2 | - 7.3 | Type I collagen C-peptide (µL) *                   | - 0.1 | - 0.1 |                                   |        |        |
|                                                                               | Early switch   | Late switch                                                                                                                |                                                                                                                                                                                                                                                                                                                                                                                                                                                                |                                                                        |                                                                |                |            |        |        |             |        |        |             |        |        |              |        |        |              |        |        |                                                                                                                                                                                                                                                                                                                                                                                                                                                                                                                                                                                                                         |  |                |                |                                                                               |       |       |                                                                           |      |      |                                                                           |       |       |                                                                  |        |        |                                                                                                                                                                                                                                                                                                                                                                                                                                                                                                    |        |              |                                                                                                                                                                                                                                                                                                                                                                                                                                                                                                              |                                                 |                |                |                                                  |       |       |                                                    |       |       |                                                    |       |       |                                   |        |        |
| TC (mg/dL)                                                                    | + 0.13         | + 0.08                                                                                                                     |                                                                                                                                                                                                                                                                                                                                                                                                                                                                |                                                                        |                                                                |                |            |        |        |             |        |        |             |        |        |              |        |        |              |        |        |                                                                                                                                                                                                                                                                                                                                                                                                                                                                                                                                                                                                                         |  |                |                |                                                                               |       |       |                                                                           |      |      |                                                                           |       |       |                                                                  |        |        |                                                                                                                                                                                                                                                                                                                                                                                                                                                                                                    |        |              |                                                                                                                                                                                                                                                                                                                                                                                                                                                                                                              |                                                 |                |                |                                                  |       |       |                                                    |       |       |                                                    |       |       |                                   |        |        |
| HDL (mg/dL)                                                                   | + 0.05         | + 0.01                                                                                                                     |                                                                                                                                                                                                                                                                                                                                                                                                                                                                |                                                                        |                                                                |                |            |        |        |             |        |        |             |        |        |              |        |        |              |        |        |                                                                                                                                                                                                                                                                                                                                                                                                                                                                                                                                                                                                                         |  |                |                |                                                                               |       |       |                                                                           |      |      |                                                                           |       |       |                                                                  |        |        |                                                                                                                                                                                                                                                                                                                                                                                                                                                                                                    |        |              |                                                                                                                                                                                                                                                                                                                                                                                                                                                                                                              |                                                 |                |                |                                                  |       |       |                                                    |       |       |                                                    |       |       |                                   |        |        |
| LDL (mg/dL)                                                                   | + 0.11         | + 0.12                                                                                                                     |                                                                                                                                                                                                                                                                                                                                                                                                                                                                |                                                                        |                                                                |                |            |        |        |             |        |        |             |        |        |              |        |        |              |        |        |                                                                                                                                                                                                                                                                                                                                                                                                                                                                                                                                                                                                                         |  |                |                |                                                                               |       |       |                                                                           |      |      |                                                                           |       |       |                                                                  |        |        |                                                                                                                                                                                                                                                                                                                                                                                                                                                                                                    |        |              |                                                                                                                                                                                                                                                                                                                                                                                                                                                                                                              |                                                 |                |                |                                                  |       |       |                                                    |       |       |                                                    |       |       |                                   |        |        |
| TRIG (mg/dL)                                                                  | - 0.02         | - 0.12                                                                                                                     |                                                                                                                                                                                                                                                                                                                                                                                                                                                                |                                                                        |                                                                |                |            |        |        |             |        |        |             |        |        |              |        |        |              |        |        |                                                                                                                                                                                                                                                                                                                                                                                                                                                                                                                                                                                                                         |  |                |                |                                                                               |       |       |                                                                           |      |      |                                                                           |       |       |                                                                  |        |        |                                                                                                                                                                                                                                                                                                                                                                                                                                                                                                    |        |              |                                                                                                                                                                                                                                                                                                                                                                                                                                                                                                              |                                                 |                |                |                                                  |       |       |                                                    |       |       |                                                    |       |       |                                   |        |        |
| TC/HDL ratio                                                                  | - 0.04         | + 0.03                                                                                                                     |                                                                                                                                                                                                                                                                                                                                                                                                                                                                |                                                                        |                                                                |                |            |        |        |             |        |        |             |        |        |              |        |        |              |        |        |                                                                                                                                                                                                                                                                                                                                                                                                                                                                                                                                                                                                                         |  |                |                |                                                                               |       |       |                                                                           |      |      |                                                                           |       |       |                                                                  |        |        |                                                                                                                                                                                                                                                                                                                                                                                                                                                                                                    |        |              |                                                                                                                                                                                                                                                                                                                                                                                                                                                                                                              |                                                 |                |                |                                                  |       |       |                                                    |       |       |                                                    |       |       |                                   |        |        |
|                                                                               | Early switch   | Late switch                                                                                                                |                                                                                                                                                                                                                                                                                                                                                                                                                                                                |                                                                        |                                                                |                |            |        |        |             |        |        |             |        |        |              |        |        |              |        |        |                                                                                                                                                                                                                                                                                                                                                                                                                                                                                                                                                                                                                         |  |                |                |                                                                               |       |       |                                                                           |      |      |                                                                           |       |       |                                                                  |        |        |                                                                                                                                                                                                                                                                                                                                                                                                                                                                                                    |        |              |                                                                                                                                                                                                                                                                                                                                                                                                                                                                                                              |                                                 |                |                |                                                  |       |       |                                                    |       |       |                                                    |       |       |                                   |        |        |
| % change in urine retinol-binding protein/creatinine ratio (+ TDF pre-switch) | -28.8          | -22.3                                                                                                                      |                                                                                                                                                                                                                                                                                                                                                                                                                                                                |                                                                        |                                                                |                |            |        |        |             |        |        |             |        |        |              |        |        |              |        |        |                                                                                                                                                                                                                                                                                                                                                                                                                                                                                                                                                                                                                         |  |                |                |                                                                               |       |       |                                                                           |      |      |                                                                           |       |       |                                                                  |        |        |                                                                                                                                                                                                                                                                                                                                                                                                                                                                                                    |        |              |                                                                                                                                                                                                                                                                                                                                                                                                                                                                                                              |                                                 |                |                |                                                  |       |       |                                                    |       |       |                                                    |       |       |                                   |        |        |
| % change in urine β2 microglobulin/Cr ratio, (no TDF pre-switch)              | -2.3           | +0.4                                                                                                                       |                                                                                                                                                                                                                                                                                                                                                                                                                                                                |                                                                        |                                                                |                |            |        |        |             |        |        |             |        |        |              |        |        |              |        |        |                                                                                                                                                                                                                                                                                                                                                                                                                                                                                                                                                                                                                         |  |                |                |                                                                               |       |       |                                                                           |      |      |                                                                           |       |       |                                                                  |        |        |                                                                                                                                                                                                                                                                                                                                                                                                                                                                                                    |        |              |                                                                                                                                                                                                                                                                                                                                                                                                                                                                                                              |                                                 |                |                |                                                  |       |       |                                                    |       |       |                                                    |       |       |                                   |        |        |
| % change in urine β2 microglobulin/Cr ratio, (+ TDF pre-switch)               | -34.8          | -41.5                                                                                                                      |                                                                                                                                                                                                                                                                                                                                                                                                                                                                |                                                                        |                                                                |                |            |        |        |             |        |        |             |        |        |              |        |        |              |        |        |                                                                                                                                                                                                                                                                                                                                                                                                                                                                                                                                                                                                                         |  |                |                |                                                                               |       |       |                                                                           |      |      |                                                                           |       |       |                                                                  |        |        |                                                                                                                                                                                                                                                                                                                                                                                                                                                                                                    |        |              |                                                                                                                                                                                                                                                                                                                                                                                                                                                                                                              |                                                 |                |                |                                                  |       |       |                                                    |       |       |                                                    |       |       |                                   |        |        |
| % change in urine β2 microglobulin/Cr ratio, (no TDF pre-switch)              | -28.9          | +1.6                                                                                                                       |                                                                                                                                                                                                                                                                                                                                                                                                                                                                |                                                                        |                                                                |                |            |        |        |             |        |        |             |        |        |              |        |        |              |        |        |                                                                                                                                                                                                                                                                                                                                                                                                                                                                                                                                                                                                                         |  |                |                |                                                                               |       |       |                                                                           |      |      |                                                                           |       |       |                                                                  |        |        |                                                                                                                                                                                                                                                                                                                                                                                                                                                                                                    |        |              |                                                                                                                                                                                                                                                                                                                                                                                                                                                                                                              |                                                 |                |                |                                                  |       |       |                                                    |       |       |                                                    |       |       |                                   |        |        |
|                                                                               | Early switch   | Late switch                                                                                                                |                                                                                                                                                                                                                                                                                                                                                                                                                                                                |                                                                        |                                                                |                |            |        |        |             |        |        |             |        |        |              |        |        |              |        |        |                                                                                                                                                                                                                                                                                                                                                                                                                                                                                                                                                                                                                         |  |                |                |                                                                               |       |       |                                                                           |      |      |                                                                           |       |       |                                                                  |        |        |                                                                                                                                                                                                                                                                                                                                                                                                                                                                                                    |        |              |                                                                                                                                                                                                                                                                                                                                                                                                                                                                                                              |                                                 |                |                |                                                  |       |       |                                                    |       |       |                                                    |       |       |                                   |        |        |
| Serum bone-specific alkaline phosphatase (µL)**                               | - 3.4          | - 3.5                                                                                                                      |                                                                                                                                                                                                                                                                                                                                                                                                                                                                |                                                                        |                                                                |                |            |        |        |             |        |        |             |        |        |              |        |        |              |        |        |                                                                                                                                                                                                                                                                                                                                                                                                                                                                                                                                                                                                                         |  |                |                |                                                                               |       |       |                                                                           |      |      |                                                                           |       |       |                                                                  |        |        |                                                                                                                                                                                                                                                                                                                                                                                                                                                                                                    |        |              |                                                                                                                                                                                                                                                                                                                                                                                                                                                                                                              |                                                 |                |                |                                                  |       |       |                                                    |       |       |                                                    |       |       |                                   |        |        |
| Serum osteocalcin (µL)**                                                      | - 4.9          | - 4.8                                                                                                                      |                                                                                                                                                                                                                                                                                                                                                                                                                                                                |                                                                        |                                                                |                |            |        |        |             |        |        |             |        |        |              |        |        |              |        |        |                                                                                                                                                                                                                                                                                                                                                                                                                                                                                                                                                                                                                         |  |                |                |                                                                               |       |       |                                                                           |      |      |                                                                           |       |       |                                                                  |        |        |                                                                                                                                                                                                                                                                                                                                                                                                                                                                                                    |        |              |                                                                                                                                                                                                                                                                                                                                                                                                                                                                                                              |                                                 |                |                |                                                  |       |       |                                                    |       |       |                                                    |       |       |                                   |        |        |
| Serum procollagen-1 N-terminal pro-peptide (µL) **                            | - 4.2          | - 7.3                                                                                                                      |                                                                                                                                                                                                                                                                                                                                                                                                                                                                |                                                                        |                                                                |                |            |        |        |             |        |        |             |        |        |              |        |        |              |        |        |                                                                                                                                                                                                                                                                                                                                                                                                                                                                                                                                                                                                                         |  |                |                |                                                                               |       |       |                                                                           |      |      |                                                                           |       |       |                                                                  |        |        |                                                                                                                                                                                                                                                                                                                                                                                                                                                                                                    |        |              |                                                                                                                                                                                                                                                                                                                                                                                                                                                                                                              |                                                 |                |                |                                                  |       |       |                                                    |       |       |                                                    |       |       |                                   |        |        |
| Type I collagen C-peptide (µL) *                                              | - 0.1          | - 0.1                                                                                                                      |                                                                                                                                                                                                                                                                                                                                                                                                                                                                |                                                                        |                                                                |                |            |        |        |             |        |        |             |        |        |              |        |        |              |        |        |                                                                                                                                                                                                                                                                                                                                                                                                                                                                                                                                                                                                                         |  |                |                |                                                                               |       |       |                                                                           |      |      |                                                                           |       |       |                                                                  |        |        |                                                                                                                                                                                                                                                                                                                                                                                                                                                                                                    |        |              |                                                                                                                                                                                                                                                                                                                                                                                                                                                                                                              |                                                 |                |                |                                                  |       |       |                                                    |       |       |                                                    |       |       |                                   |        |        |
|                                                                               |                |                                                                                                                            | * No meaningful differences detected in mean change from baseline/ late-switch baseline                                                                                                                                                                                                                                                                                                                                                                        |                                                                        |                                                                |                |            |        |        |             |        |        |             |        |        |              |        |        |              |        |        |                                                                                                                                                                                                                                                                                                                                                                                                                                                                                                                                                                                                                         |  |                |                |                                                                               |       |       |                                                                           |      |      |                                                                           |       |       |                                                                  |        |        |                                                                                                                                                                                                                                                                                                                                                                                                                                                                                                    |        |              |                                                                                                                                                                                                                                                                                                                                                                                                                                                                                                              |                                                 |                |                |                                                  |       |       |                                                    |       |       |                                                    |       |       |                                   |        |        |

| DUALIS <sup>33</sup>                       | DTG + bDRV     | Continuation of 2 NRTI + bDRV        | Mean change in lipids from baseline (week 48):                                                                                                                                                                                                                                                                                                                                                                                                                                                                                                                                                                                                                              | Not reported | Not reported   |                |               |        |       |                       |       |       |                |        |       |                                                                                                                                                                                                                                                                                     |        |                |                       |                                   |       |                                                                                                                                                                                                                                                                                                                                                      |                                                                                                                                                                                                                                                                                     |                |                |                                            |                                   |        |                                |                                                                                                                                                                                                                                                                                                                                                                                                                                              |   |                |                |                            |              |       |                           |       |       |                                 |       |       |
|--------------------------------------------|----------------|--------------------------------------|-----------------------------------------------------------------------------------------------------------------------------------------------------------------------------------------------------------------------------------------------------------------------------------------------------------------------------------------------------------------------------------------------------------------------------------------------------------------------------------------------------------------------------------------------------------------------------------------------------------------------------------------------------------------------------|--------------|----------------|----------------|---------------|--------|-------|-----------------------|-------|-------|----------------|--------|-------|-------------------------------------------------------------------------------------------------------------------------------------------------------------------------------------------------------------------------------------------------------------------------------------|--------|----------------|-----------------------|-----------------------------------|-------|------------------------------------------------------------------------------------------------------------------------------------------------------------------------------------------------------------------------------------------------------------------------------------------------------------------------------------------------------|-------------------------------------------------------------------------------------------------------------------------------------------------------------------------------------------------------------------------------------------------------------------------------------|----------------|----------------|--------------------------------------------|-----------------------------------|--------|--------------------------------|----------------------------------------------------------------------------------------------------------------------------------------------------------------------------------------------------------------------------------------------------------------------------------------------------------------------------------------------------------------------------------------------------------------------------------------------|---|----------------|----------------|----------------------------|--------------|-------|---------------------------|-------|-------|---------------------------------|-------|-------|
| OLE <sup>27</sup>                          | LPV/r + 3TC    | LPV/r + 3TC or FTC + a second NRTI   | <table border="1"> <thead> <tr> <th></th> <th>2-drug regimen</th> <th>3-drug regimen</th> </tr> </thead> <tbody> <tr> <td>TC (mg/dL) *</td> <td>+ 20.0</td> <td>0.0</td> </tr> <tr> <td>HDL (mg/dL) *</td> <td>+ 4.9</td> <td>- 1.0</td> </tr> <tr> <td>LDL (mg/dL) *</td> <td>+ 13.3</td> <td>0.0</td> </tr> <tr> <td>Triglycerides (mg/dL) *</td> <td>+ 12.5</td> <td>+ 11.0</td> </tr> <tr> <td>TC/HDL ratio *</td> <td>- 0.5</td> <td>+ 0.1</td> </tr> </tbody> </table>                                                                                                                                                                                                |              | 2-drug regimen | 3-drug regimen | TC (mg/dL) *  | + 20.0 | 0.0   | HDL (mg/dL) *         | + 4.9 | - 1.0 | LDL (mg/dL) *  | + 13.3 | 0.0   | Triglycerides (mg/dL) *                                                                                                                                                                                                                                                             | + 12.5 | + 11.0         | TC/HDL ratio *        | - 0.5                             | + 0.1 | <table border="1"> <thead> <tr> <th></th> <th>2-drug regimen</th> <th>3-drug regimen</th> </tr> </thead> <tbody> <tr> <td>eGFR (mL/min/1.73m<sup>2</sup>)</td> <td>+ 5.04</td> <td>- 1.05</td> </tr> </tbody> </table>                                                                                                                               |                                                                                                                                                                                                                                                                                     | 2-drug regimen | 3-drug regimen | eGFR (mL/min/1.73m <sup>2</sup> )          | + 5.04                            | - 1.05 | Not reported                   |                                                                                                                                                                                                                                                                                                                                                                                                                                              |   |                |                |                            |              |       |                           |       |       |                                 |       |       |
|                                            | 2-drug regimen | 3-drug regimen                       |                                                                                                                                                                                                                                                                                                                                                                                                                                                                                                                                                                                                                                                                             |              |                |                |               |        |       |                       |       |       |                |        |       |                                                                                                                                                                                                                                                                                     |        |                |                       |                                   |       |                                                                                                                                                                                                                                                                                                                                                      |                                                                                                                                                                                                                                                                                     |                |                |                                            |                                   |        |                                |                                                                                                                                                                                                                                                                                                                                                                                                                                              |   |                |                |                            |              |       |                           |       |       |                                 |       |       |
| TC (mg/dL) *                               | + 20.0         | 0.0                                  |                                                                                                                                                                                                                                                                                                                                                                                                                                                                                                                                                                                                                                                                             |              |                |                |               |        |       |                       |       |       |                |        |       |                                                                                                                                                                                                                                                                                     |        |                |                       |                                   |       |                                                                                                                                                                                                                                                                                                                                                      |                                                                                                                                                                                                                                                                                     |                |                |                                            |                                   |        |                                |                                                                                                                                                                                                                                                                                                                                                                                                                                              |   |                |                |                            |              |       |                           |       |       |                                 |       |       |
| HDL (mg/dL) *                              | + 4.9          | - 1.0                                |                                                                                                                                                                                                                                                                                                                                                                                                                                                                                                                                                                                                                                                                             |              |                |                |               |        |       |                       |       |       |                |        |       |                                                                                                                                                                                                                                                                                     |        |                |                       |                                   |       |                                                                                                                                                                                                                                                                                                                                                      |                                                                                                                                                                                                                                                                                     |                |                |                                            |                                   |        |                                |                                                                                                                                                                                                                                                                                                                                                                                                                                              |   |                |                |                            |              |       |                           |       |       |                                 |       |       |
| LDL (mg/dL) *                              | + 13.3         | 0.0                                  |                                                                                                                                                                                                                                                                                                                                                                                                                                                                                                                                                                                                                                                                             |              |                |                |               |        |       |                       |       |       |                |        |       |                                                                                                                                                                                                                                                                                     |        |                |                       |                                   |       |                                                                                                                                                                                                                                                                                                                                                      |                                                                                                                                                                                                                                                                                     |                |                |                                            |                                   |        |                                |                                                                                                                                                                                                                                                                                                                                                                                                                                              |   |                |                |                            |              |       |                           |       |       |                                 |       |       |
| Triglycerides (mg/dL) *                    | + 12.5         | + 11.0                               |                                                                                                                                                                                                                                                                                                                                                                                                                                                                                                                                                                                                                                                                             |              |                |                |               |        |       |                       |       |       |                |        |       |                                                                                                                                                                                                                                                                                     |        |                |                       |                                   |       |                                                                                                                                                                                                                                                                                                                                                      |                                                                                                                                                                                                                                                                                     |                |                |                                            |                                   |        |                                |                                                                                                                                                                                                                                                                                                                                                                                                                                              |   |                |                |                            |              |       |                           |       |       |                                 |       |       |
| TC/HDL ratio *                             | - 0.5          | + 0.1                                |                                                                                                                                                                                                                                                                                                                                                                                                                                                                                                                                                                                                                                                                             |              |                |                |               |        |       |                       |       |       |                |        |       |                                                                                                                                                                                                                                                                                     |        |                |                       |                                   |       |                                                                                                                                                                                                                                                                                                                                                      |                                                                                                                                                                                                                                                                                     |                |                |                                            |                                   |        |                                |                                                                                                                                                                                                                                                                                                                                                                                                                                              |   |                |                |                            |              |       |                           |       |       |                                 |       |       |
|                                            | 2-drug regimen | 3-drug regimen                       |                                                                                                                                                                                                                                                                                                                                                                                                                                                                                                                                                                                                                                                                             |              |                |                |               |        |       |                       |       |       |                |        |       |                                                                                                                                                                                                                                                                                     |        |                |                       |                                   |       |                                                                                                                                                                                                                                                                                                                                                      |                                                                                                                                                                                                                                                                                     |                |                |                                            |                                   |        |                                |                                                                                                                                                                                                                                                                                                                                                                                                                                              |   |                |                |                            |              |       |                           |       |       |                                 |       |       |
| eGFR (mL/min/1.73m <sup>2</sup> )          | + 5.04         | - 1.05                               |                                                                                                                                                                                                                                                                                                                                                                                                                                                                                                                                                                                                                                                                             |              |                |                |               |        |       |                       |       |       |                |        |       |                                                                                                                                                                                                                                                                                     |        |                |                       |                                   |       |                                                                                                                                                                                                                                                                                                                                                      |                                                                                                                                                                                                                                                                                     |                |                |                                            |                                   |        |                                |                                                                                                                                                                                                                                                                                                                                                                                                                                              |   |                |                |                            |              |       |                           |       |       |                                 |       |       |
| SALT <sup>28,29</sup>                      | ATV/r + 3TC    | ATV/r + 2 NRTIs                      | <table border="1"> <thead> <tr> <th></th> <th>2-drug regimen</th> <th>3-drug regimen</th> </tr> </thead> <tbody> <tr> <td>TC (mg/dL) **</td> <td>+ 4.1</td> <td>- 6.5</td> </tr> <tr> <td>Triglycerides (mg/dL)</td> <td>+ 0.2</td> <td>- 4.3</td> </tr> <tr> <td>TC/HDL ratio *</td> <td>+ 1.3</td> <td>- 4.7</td> </tr> </tbody> </table>                                                                                                                                                                                                                                                                                                                                 |              | 2-drug regimen | 3-drug regimen | TC (mg/dL) ** | + 4.1  | - 6.5 | Triglycerides (mg/dL) | + 0.2 | - 4.3 | TC/HDL ratio * | + 1.3  | - 4.7 | <table border="1"> <thead> <tr> <th></th> <th>2-drug regimen</th> <th>3-drug regimen</th> </tr> </thead> <tbody> <tr> <td>eGFR (mL/min/1.73m<sup>2</sup>)</td> <td>- 1.1</td> <td>- 0.5</td> </tr> </tbody> </table> <p>*No statistically significant differences from baseline</p> |        | 2-drug regimen | 3-drug regimen        | eGFR (mL/min/1.73m <sup>2</sup> ) | - 1.1 | - 0.5                                                                                                                                                                                                                                                                                                                                                | <table border="1"> <thead> <tr> <th></th> <th>2-drug regimen</th> <th>3-drug regimen</th> </tr> </thead> <tbody> <tr> <td>eGFR (mL/min/1.73m<sup>2</sup>)</td> <td>- 1.1</td> <td>- 0.5</td> </tr> </tbody> </table> <p>*No statistically significant differences from baseline</p> |                | 2-drug regimen | 3-drug regimen                             | eGFR (mL/min/1.73m <sup>2</sup> ) | - 1.1  | - 0.5                          | <table border="1"> <thead> <tr> <th></th> <th>2-drug regimen</th> <th>3-drug regimen</th> </tr> </thead> <tbody> <tr> <td>Trunk fat (DEXA); % change</td> <td>+ 3.5</td> <td>+ 3.1</td> </tr> <tr> <td>Limb fat (DEXA); % change</td> <td>+ 3.5</td> <td>+ 1.4</td> </tr> <tr> <td>Limb: Trunk fat ratio; % change</td> <td>+ 0.2</td> <td>- 3.0</td> </tr> </tbody> </table> <p>*No statistically significant differences from baseline</p> |   | 2-drug regimen | 3-drug regimen | Trunk fat (DEXA); % change | + 3.5        | + 3.1 | Limb fat (DEXA); % change | + 3.5 | + 1.4 | Limb: Trunk fat ratio; % change | + 0.2 | - 3.0 |
|                                            | 2-drug regimen | 3-drug regimen                       |                                                                                                                                                                                                                                                                                                                                                                                                                                                                                                                                                                                                                                                                             |              |                |                |               |        |       |                       |       |       |                |        |       |                                                                                                                                                                                                                                                                                     |        |                |                       |                                   |       |                                                                                                                                                                                                                                                                                                                                                      |                                                                                                                                                                                                                                                                                     |                |                |                                            |                                   |        |                                |                                                                                                                                                                                                                                                                                                                                                                                                                                              |   |                |                |                            |              |       |                           |       |       |                                 |       |       |
| TC (mg/dL) **                              | + 4.1          | - 6.5                                |                                                                                                                                                                                                                                                                                                                                                                                                                                                                                                                                                                                                                                                                             |              |                |                |               |        |       |                       |       |       |                |        |       |                                                                                                                                                                                                                                                                                     |        |                |                       |                                   |       |                                                                                                                                                                                                                                                                                                                                                      |                                                                                                                                                                                                                                                                                     |                |                |                                            |                                   |        |                                |                                                                                                                                                                                                                                                                                                                                                                                                                                              |   |                |                |                            |              |       |                           |       |       |                                 |       |       |
| Triglycerides (mg/dL)                      | + 0.2          | - 4.3                                |                                                                                                                                                                                                                                                                                                                                                                                                                                                                                                                                                                                                                                                                             |              |                |                |               |        |       |                       |       |       |                |        |       |                                                                                                                                                                                                                                                                                     |        |                |                       |                                   |       |                                                                                                                                                                                                                                                                                                                                                      |                                                                                                                                                                                                                                                                                     |                |                |                                            |                                   |        |                                |                                                                                                                                                                                                                                                                                                                                                                                                                                              |   |                |                |                            |              |       |                           |       |       |                                 |       |       |
| TC/HDL ratio *                             | + 1.3          | - 4.7                                |                                                                                                                                                                                                                                                                                                                                                                                                                                                                                                                                                                                                                                                                             |              |                |                |               |        |       |                       |       |       |                |        |       |                                                                                                                                                                                                                                                                                     |        |                |                       |                                   |       |                                                                                                                                                                                                                                                                                                                                                      |                                                                                                                                                                                                                                                                                     |                |                |                                            |                                   |        |                                |                                                                                                                                                                                                                                                                                                                                                                                                                                              |   |                |                |                            |              |       |                           |       |       |                                 |       |       |
|                                            | 2-drug regimen | 3-drug regimen                       |                                                                                                                                                                                                                                                                                                                                                                                                                                                                                                                                                                                                                                                                             |              |                |                |               |        |       |                       |       |       |                |        |       |                                                                                                                                                                                                                                                                                     |        |                |                       |                                   |       |                                                                                                                                                                                                                                                                                                                                                      |                                                                                                                                                                                                                                                                                     |                |                |                                            |                                   |        |                                |                                                                                                                                                                                                                                                                                                                                                                                                                                              |   |                |                |                            |              |       |                           |       |       |                                 |       |       |
| eGFR (mL/min/1.73m <sup>2</sup> )          | - 1.1          | - 0.5                                |                                                                                                                                                                                                                                                                                                                                                                                                                                                                                                                                                                                                                                                                             |              |                |                |               |        |       |                       |       |       |                |        |       |                                                                                                                                                                                                                                                                                     |        |                |                       |                                   |       |                                                                                                                                                                                                                                                                                                                                                      |                                                                                                                                                                                                                                                                                     |                |                |                                            |                                   |        |                                |                                                                                                                                                                                                                                                                                                                                                                                                                                              |   |                |                |                            |              |       |                           |       |       |                                 |       |       |
|                                            | 2-drug regimen | 3-drug regimen                       |                                                                                                                                                                                                                                                                                                                                                                                                                                                                                                                                                                                                                                                                             |              |                |                |               |        |       |                       |       |       |                |        |       |                                                                                                                                                                                                                                                                                     |        |                |                       |                                   |       |                                                                                                                                                                                                                                                                                                                                                      |                                                                                                                                                                                                                                                                                     |                |                |                                            |                                   |        |                                |                                                                                                                                                                                                                                                                                                                                                                                                                                              |   |                |                |                            |              |       |                           |       |       |                                 |       |       |
| eGFR (mL/min/1.73m <sup>2</sup> )          | - 1.1          | - 0.5                                |                                                                                                                                                                                                                                                                                                                                                                                                                                                                                                                                                                                                                                                                             |              |                |                |               |        |       |                       |       |       |                |        |       |                                                                                                                                                                                                                                                                                     |        |                |                       |                                   |       |                                                                                                                                                                                                                                                                                                                                                      |                                                                                                                                                                                                                                                                                     |                |                |                                            |                                   |        |                                |                                                                                                                                                                                                                                                                                                                                                                                                                                              |   |                |                |                            |              |       |                           |       |       |                                 |       |       |
|                                            | 2-drug regimen | 3-drug regimen                       |                                                                                                                                                                                                                                                                                                                                                                                                                                                                                                                                                                                                                                                                             |              |                |                |               |        |       |                       |       |       |                |        |       |                                                                                                                                                                                                                                                                                     |        |                |                       |                                   |       |                                                                                                                                                                                                                                                                                                                                                      |                                                                                                                                                                                                                                                                                     |                |                |                                            |                                   |        |                                |                                                                                                                                                                                                                                                                                                                                                                                                                                              |   |                |                |                            |              |       |                           |       |       |                                 |       |       |
| Trunk fat (DEXA); % change                 | + 3.5          | + 3.1                                |                                                                                                                                                                                                                                                                                                                                                                                                                                                                                                                                                                                                                                                                             |              |                |                |               |        |       |                       |       |       |                |        |       |                                                                                                                                                                                                                                                                                     |        |                |                       |                                   |       |                                                                                                                                                                                                                                                                                                                                                      |                                                                                                                                                                                                                                                                                     |                |                |                                            |                                   |        |                                |                                                                                                                                                                                                                                                                                                                                                                                                                                              |   |                |                |                            |              |       |                           |       |       |                                 |       |       |
| Limb fat (DEXA); % change                  | + 3.5          | + 1.4                                |                                                                                                                                                                                                                                                                                                                                                                                                                                                                                                                                                                                                                                                                             |              |                |                |               |        |       |                       |       |       |                |        |       |                                                                                                                                                                                                                                                                                     |        |                |                       |                                   |       |                                                                                                                                                                                                                                                                                                                                                      |                                                                                                                                                                                                                                                                                     |                |                |                                            |                                   |        |                                |                                                                                                                                                                                                                                                                                                                                                                                                                                              |   |                |                |                            |              |       |                           |       |       |                                 |       |       |
| Limb: Trunk fat ratio; % change            | + 0.2          | - 3.0                                |                                                                                                                                                                                                                                                                                                                                                                                                                                                                                                                                                                                                                                                                             |              |                |                |               |        |       |                       |       |       |                |        |       |                                                                                                                                                                                                                                                                                     |        |                |                       |                                   |       |                                                                                                                                                                                                                                                                                                                                                      |                                                                                                                                                                                                                                                                                     |                |                |                                            |                                   |        |                                |                                                                                                                                                                                                                                                                                                                                                                                                                                              |   |                |                |                            |              |       |                           |       |       |                                 |       |       |
| DUAL- GESIDA 8014-RIS-EST45 <sup>32</sup>  | DRV/r + 3TC    | DRV/r + TDF/FTC OR DRV/r + ABC + 3TC | <table border="1"> <thead> <tr> <th></th> <th>2-drug regimen</th> <th>3-drug regimen</th> </tr> </thead> <tbody> <tr> <td>TC (mg/dL) **</td> <td>13</td> <td>0</td> </tr> <tr> <td>LDL (mg/dL)</td> <td>6</td> <td>2</td> </tr> <tr> <td>HDL (mg/dL) **</td> <td>2</td> <td>-1</td> </tr> <tr> <td>TC/HDL ratio</td> <td>0</td> <td>0</td> </tr> <tr> <td>Triglycerides (mg/dL)</td> <td>3</td> <td>0</td> </tr> </tbody> </table> <p>*Switching to dual therapy associated with significant increases in TC, LDL, &amp; HDL, but not HDL/TC in those who received TDF at baseline</p> <p>*No significant change in lipids in participants who received ABC at baseline</p> |              | 2-drug regimen | 3-drug regimen | TC (mg/dL) ** | 13     | 0     | LDL (mg/dL)           | 6     | 2     | HDL (mg/dL) ** | 2      | -1    | TC/HDL ratio                                                                                                                                                                                                                                                                        | 0      | 0              | Triglycerides (mg/dL) | 3                                 | 0     | <table border="1"> <thead> <tr> <th></th> <th>2-drug regimen</th> <th>3-drug regimen</th> </tr> </thead> <tbody> <tr> <td>eGFR CKD-EPI (mL/min/1.73 m<sup>2</sup>)</td> <td>2</td> <td>1</td> </tr> <tr> <td>eGFR Cockcroft Gault (ml/min)*</td> <td>5</td> <td>2</td> </tr> <tr> <td>Creatinine*</td> <td>6</td> <td>2</td> </tr> </tbody> </table> |                                                                                                                                                                                                                                                                                     | 2-drug regimen | 3-drug regimen | eGFR CKD-EPI (mL/min/1.73 m <sup>2</sup> ) | 2                                 | 1      | eGFR Cockcroft Gault (ml/min)* | 5                                                                                                                                                                                                                                                                                                                                                                                                                                            | 2 | Creatinine*    | 6              | 2                          | Not reported |       |                           |       |       |                                 |       |       |
|                                            | 2-drug regimen | 3-drug regimen                       |                                                                                                                                                                                                                                                                                                                                                                                                                                                                                                                                                                                                                                                                             |              |                |                |               |        |       |                       |       |       |                |        |       |                                                                                                                                                                                                                                                                                     |        |                |                       |                                   |       |                                                                                                                                                                                                                                                                                                                                                      |                                                                                                                                                                                                                                                                                     |                |                |                                            |                                   |        |                                |                                                                                                                                                                                                                                                                                                                                                                                                                                              |   |                |                |                            |              |       |                           |       |       |                                 |       |       |
| TC (mg/dL) **                              | 13             | 0                                    |                                                                                                                                                                                                                                                                                                                                                                                                                                                                                                                                                                                                                                                                             |              |                |                |               |        |       |                       |       |       |                |        |       |                                                                                                                                                                                                                                                                                     |        |                |                       |                                   |       |                                                                                                                                                                                                                                                                                                                                                      |                                                                                                                                                                                                                                                                                     |                |                |                                            |                                   |        |                                |                                                                                                                                                                                                                                                                                                                                                                                                                                              |   |                |                |                            |              |       |                           |       |       |                                 |       |       |
| LDL (mg/dL)                                | 6              | 2                                    |                                                                                                                                                                                                                                                                                                                                                                                                                                                                                                                                                                                                                                                                             |              |                |                |               |        |       |                       |       |       |                |        |       |                                                                                                                                                                                                                                                                                     |        |                |                       |                                   |       |                                                                                                                                                                                                                                                                                                                                                      |                                                                                                                                                                                                                                                                                     |                |                |                                            |                                   |        |                                |                                                                                                                                                                                                                                                                                                                                                                                                                                              |   |                |                |                            |              |       |                           |       |       |                                 |       |       |
| HDL (mg/dL) **                             | 2              | -1                                   |                                                                                                                                                                                                                                                                                                                                                                                                                                                                                                                                                                                                                                                                             |              |                |                |               |        |       |                       |       |       |                |        |       |                                                                                                                                                                                                                                                                                     |        |                |                       |                                   |       |                                                                                                                                                                                                                                                                                                                                                      |                                                                                                                                                                                                                                                                                     |                |                |                                            |                                   |        |                                |                                                                                                                                                                                                                                                                                                                                                                                                                                              |   |                |                |                            |              |       |                           |       |       |                                 |       |       |
| TC/HDL ratio                               | 0              | 0                                    |                                                                                                                                                                                                                                                                                                                                                                                                                                                                                                                                                                                                                                                                             |              |                |                |               |        |       |                       |       |       |                |        |       |                                                                                                                                                                                                                                                                                     |        |                |                       |                                   |       |                                                                                                                                                                                                                                                                                                                                                      |                                                                                                                                                                                                                                                                                     |                |                |                                            |                                   |        |                                |                                                                                                                                                                                                                                                                                                                                                                                                                                              |   |                |                |                            |              |       |                           |       |       |                                 |       |       |
| Triglycerides (mg/dL)                      | 3              | 0                                    |                                                                                                                                                                                                                                                                                                                                                                                                                                                                                                                                                                                                                                                                             |              |                |                |               |        |       |                       |       |       |                |        |       |                                                                                                                                                                                                                                                                                     |        |                |                       |                                   |       |                                                                                                                                                                                                                                                                                                                                                      |                                                                                                                                                                                                                                                                                     |                |                |                                            |                                   |        |                                |                                                                                                                                                                                                                                                                                                                                                                                                                                              |   |                |                |                            |              |       |                           |       |       |                                 |       |       |
|                                            | 2-drug regimen | 3-drug regimen                       |                                                                                                                                                                                                                                                                                                                                                                                                                                                                                                                                                                                                                                                                             |              |                |                |               |        |       |                       |       |       |                |        |       |                                                                                                                                                                                                                                                                                     |        |                |                       |                                   |       |                                                                                                                                                                                                                                                                                                                                                      |                                                                                                                                                                                                                                                                                     |                |                |                                            |                                   |        |                                |                                                                                                                                                                                                                                                                                                                                                                                                                                              |   |                |                |                            |              |       |                           |       |       |                                 |       |       |
| eGFR CKD-EPI (mL/min/1.73 m <sup>2</sup> ) | 2              | 1                                    |                                                                                                                                                                                                                                                                                                                                                                                                                                                                                                                                                                                                                                                                             |              |                |                |               |        |       |                       |       |       |                |        |       |                                                                                                                                                                                                                                                                                     |        |                |                       |                                   |       |                                                                                                                                                                                                                                                                                                                                                      |                                                                                                                                                                                                                                                                                     |                |                |                                            |                                   |        |                                |                                                                                                                                                                                                                                                                                                                                                                                                                                              |   |                |                |                            |              |       |                           |       |       |                                 |       |       |
| eGFR Cockcroft Gault (ml/min)*             | 5              | 2                                    |                                                                                                                                                                                                                                                                                                                                                                                                                                                                                                                                                                                                                                                                             |              |                |                |               |        |       |                       |       |       |                |        |       |                                                                                                                                                                                                                                                                                     |        |                |                       |                                   |       |                                                                                                                                                                                                                                                                                                                                                      |                                                                                                                                                                                                                                                                                     |                |                |                                            |                                   |        |                                |                                                                                                                                                                                                                                                                                                                                                                                                                                              |   |                |                |                            |              |       |                           |       |       |                                 |       |       |
| Creatinine*                                | 6              | 2                                    |                                                                                                                                                                                                                                                                                                                                                                                                                                                                                                                                                                                                                                                                             |              |                |                |               |        |       |                       |       |       |                |        |       |                                                                                                                                                                                                                                                                                     |        |                |                       |                                   |       |                                                                                                                                                                                                                                                                                                                                                      |                                                                                                                                                                                                                                                                                     |                |                |                                            |                                   |        |                                |                                                                                                                                                                                                                                                                                                                                                                                                                                              |   |                |                |                            |              |       |                           |       |       |                                 |       |       |

\* Significance of P<0.05

\*\* Significance of P<0.01

<sup>1</sup> No change in median eGFR by serum cystatin C, regardless of previous TDF exposure in early-switch group; late-switch group showed a transient 7% reduction at week 100 followed by a return to late-switch baseline values at week 148

**Abbreviations:** DTG Dolutegravir, 3TC Lamivudine, TDF Tenofovir Disoproxil Fumarate, TAF Tenofovir alafenamide, FTC *emtricitabine*, mmol/L Millimoles per liter, TC total cholesterol, HDL high-density lipoprotein cholesterol, LDL low-density lipoprotein cholesterol, TRIG triglyceride, eGFR estimated glomerular filtration rate, SCr serum creatinine, Cr creatinine, LPV lopinavir, r ritonavir, ABC abacavir, ATV atazanavir, BMI body mass index, RT reverse transcriptase, NRTI nucleoside reverse transcriptase inhibitors, BMD bone mineral density, NRTI nucleoside reverse transcriptase inhibitors, DEXA dual-energy X-ray absorptiometry
